1 Nonsense-mediated mRNA decay relies on "two-factor  
2 authentication" by SMG5-SMG7

3 Volker Boehm<sup>1,2,6,\*</sup>, Sabrina Kueckelmann<sup>1,2,6</sup>, Jennifer V. Gerbracht<sup>1,2</sup>, Thiago Britto-  
4 Borges<sup>3,4</sup>, Janine Altmüller<sup>5</sup>, Christoph Dieterich<sup>3,4</sup>, Niels H. Gehring<sup>1,2,\*</sup>

5 <sup>1</sup> Institute for Genetics, University of Cologne, 50674 Cologne, Germany

6 <sup>2</sup> Center for Molecular Medicine Cologne (CMMC), University of Cologne, 50937 Cologne,  
7 Germany

8 <sup>3</sup> Section of Bioinformatics and Systems Cardiology, Department of Internal Medicine III and  
9 Klaus Tschira Institute for Integrative Computational Cardiology, Heidelberg University  
10 Hospital, 69120 Heidelberg, Germany

11 <sup>4</sup> DZHK (German Centre for Cardiovascular Research), Partner site Heidelberg/Mannheim,  
12 69120 Heidelberg, Germany

13 <sup>5</sup> Cologne Center for Genomics (CCG), University of Cologne, 50931 Cologne, Germany

14 <sup>6</sup> These authors contributed equally: Volker Boehm, Sabrina Kueckelmann

15

16 \*Correspondence: [boehmv@uni-koeln.de](mailto:boehmv@uni-koeln.de) (V.B.), [ngehring@uni-koeln.de](mailto:ngehring@uni-koeln.de) (N.H.G.)

17

18 **Keywords**

19 Nonsense-mediated mRNA decay, mRNA degradation, gene expression, UPF1, SMG5-SMG7,

20 SMG6

21

22 **Abstract**

23 Eukaryotic gene expression is constantly regulated and controlled by the translation-coupled  
24 nonsense-mediated mRNA decay (NMD) pathway. Aberrant translation termination leads to NMD  
25 activation and robust clearance of NMD targets via two seemingly independent and redundant  
26 mRNA degradation branches. Here, we uncover that the loss of the first SMG5-SMG7-dependent  
27 pathway also inactivates the second SMG6-dependent branch, indicating an unexpected functional  
28 hierarchy of the final NMD steps. Transcriptome-wide analyses of SMG5-SMG7-depleted cells  
29 confirm complete NMD inhibition resulting in massive transcriptomic alterations. The NMD activity  
30 conferred by SMG5-SMG7 is determined to varying degrees by their interaction with the central  
31 NMD factor UPF1, heterodimer formation and the initiation of deadenylation. Surprisingly, we find  
32 that SMG5 functionally substitutes SMG7 and vice versa. Our data support an improved model for  
33 NMD execution that requires two-factor authentication involving UPF1 phosphorylation and SMG5-  
34 SMG7 recruitment to access SMG6 activity.

35

## 36 Introduction

37 Error-free and precisely regulated gene expression is an essential prerequisite for all living  
38 organisms. In eukaryotes, transcription and translation are controlled and fine-tuned by diverse  
39 mechanisms to ensure the generation of flawless RNAs and proteins<sup>1</sup>. Mature mRNAs that have  
40 completed all co- and post-transcriptional processing steps and passed the associated quality checks  
41 are translated into proteins as the final step of gene expression in the cytoplasm. At this point,  
42 translation-coupled mechanisms inspect the mRNA one last time to perform a final quality control.  
43 Specifically, it is assessed whether the translated mRNAs are legitimate or contain features indicating  
44 that these transcripts encode non-functional, incomplete or potentially harmful proteins and  
45 therefore have to be degraded<sup>2,3</sup>. The arguably most famous translation-coupled quality control  
46 process is nonsense-mediated mRNA decay (NMD), which is best known for its role to remove  
47 mutated transcripts containing a premature termination codon (PTC)<sup>4</sup>. However, the relevance of  
48 NMD for cellular maintenance goes beyond the quality control function and is not restricted to  
49 mutated transcripts<sup>5</sup>. Previous studies found that about 5-10% of the expressed genes are affected  
50 by NMD in different organisms<sup>6-15</sup>, suggesting that NMD serves as a regulatory mechanism, which  
51 fine-tunes general gene expression and helps to minimize the production of aberrant transcript  
52 isoforms. Furthermore, defects in the core NMD machinery are not compatible with life in higher  
53 eukaryotes<sup>16-22</sup>, underlining the importance of NMD to function properly during development and  
54 cellular maintenance.

55 In general, inefficient translation termination seems to be the primary stimulus for NMD  
56 initiation<sup>4</sup>. Recent evidence suggests that NMD can in principle be triggered by each translation  
57 termination event with a certain probability<sup>23</sup>. In higher eukaryotes, this probability can be  
58 modulated by different NMD-activating features, such as a long 3' untranslated region (UTR)<sup>24-27</sup>.  
59 However, the exact length and composition of an NMD-activating 3' UTR is not exactly defined and  
60 many mRNAs contain NMD-suppressing sequences that allow them to escape this type of NMD<sup>28-30</sup>.  
61 Another potent activator of NMD is the presence of an RNA-binding protein complex called the exon-

62 junction complex (EJC) downstream of a terminating ribosome<sup>24,31-37</sup>. The EJC serves as a mark for  
63 successful splicing and is deposited onto the mRNA approximately 20-24 nucleotides upstream of  
64 spliced junctions<sup>38-41</sup>. Stop codons are typically located in the last exon of regular protein-coding  
65 transcripts, thus ribosomes usually displace all EJCs from a translated mRNA, effectively removing the  
66 degradation-inducing feature. However, mutations or alternative splicing may produce isoforms with  
67 stop codons situated upstream of EJC deposition sites. Translation of these transcripts would fail to  
68 remove all EJCs and subsequently triggers the decay of the mRNA via efficiently activated NMD.

69 Intensive research over many decades uncovered the central players of the complex NMD  
70 pathway and how they cooperate to achieve highly specific and efficient mRNA degradation.  
71 According to generally accepted models, NMD execution requires a network of factors to identify a  
72 given translation termination event as aberrant<sup>42</sup>. The RNA helicase UPF1 holds a central position in  
73 the NMD pathway, as it serves as a binding hub for other NMD factors and is functionally involved in  
74 all stages from the recognition of NMD substrates until the disassembly of the NMD machinery<sup>43</sup>. In  
75 translation-inhibited conditions, UPF1 has the potential to bind non-specifically to all expressed  
76 transcripts. However, in unperturbed cells, UPF1 is found preferentially in the 3' UTR region of  
77 translated mRNA due to the displacement from the 5' UTR and coding region by translating  
78 ribosomes<sup>44-47</sup>. Furthermore, the ATPase and helicase activity of UPF1 is required to achieve target  
79 discrimination, resulting in increased binding of NMD-targets and release of UPF1 from non-target  
80 mRNAs<sup>48</sup>.

81 If the translated mRNA contains a premature or otherwise aberrant termination codon, the  
82 downstream bound UPF1 promotes the recruitment of NMD factors and their assembly into an  
83 NMD-activating complex. Subsequently, protein-protein interactions between UPF1, UPF2, UPF3 and  
84 - if present - the EJC stimulate the phosphorylation of SQ/TQ motifs in UPF1 by the kinase SMG1<sup>49-53</sup>.  
85 Importantly, the activity of the kinase SMG1 is regulated by multiple accessory NMD factors,  
86 presumably to prevent unwanted UPF1 phosphorylation on non-NMD targets<sup>54-58</sup>. Continued



87 presence of UPF1 on the target transcript in an NMD-activating environment leads to gradually  
88 increasing hyper-phosphorylation of UPF1 at up to 19 potential phosphorylation sites<sup>59</sup>. The  
89 progressively phosphorylated residues in the N- and C-terminal tails of UPF1 then act as binding sites  
90 for the decay-inducing factors SMG5, SMG6 and SMG7<sup>60</sup>. In this basic model, hyper-phosphorylation  
91 of UPF1 represents a “point of no return” for NMD activation, which effectively sentences the mRNA  
92 for degradation<sup>61</sup>.

93 The final execution of NMD is divided into two major branches. The first branch relies on the  
94 interaction of phosphorylated UPF1 with the heterodimer SMG5-SMG7, which in turn recruits the  
95 CCR4-NOT deadenylation complex<sup>62-64</sup>. Consequently, SMG5-SMG7 promote target mRNA  
96 deadenylation, followed by decapping and 5'-3' or 3'-5' exonucleolytic degradation<sup>65,66</sup>. The second  
97 branch is mediated by the endonuclease SMG6, which interacts with UPF1 to cleave the NMD-  
98 targeted transcript in a region around the NMD-activating stop codon<sup>36,67-71</sup>. This endonucleolytic  
99 cleavage results in the generation of two decay intermediates, which are rapidly removed by  
100 exonucleolytic decay. Both SMG5-SMG7 and SMG6-mediated degradation pathways are considered  
101 to be redundant, as they target the same transcripts<sup>14</sup>. They are also regarded as independent,  
102 because downregulation of individual factors (SMG5, SMG6 or SMG7) only partially inhibits  
103 NMD<sup>35,62,72</sup>. However, loss of SMG6 impaired NMD more severely than inactivation of SMG7,  
104 suggesting that endonucleolytic cleavage is the preferred decay pathway, whereas deadenylation has  
105 merely a backup/supplementary function<sup>14,35,62,70,71,73</sup>. Nonetheless, the apparent redundancy  
106 hampered a detailed investigation of the final steps of NMD so far, since inactivation of one decay  
107 route seemed to be partially compensated by the other.

108 Here we addressed the central question if and how SMG5-SMG7 and SMG6 functionally  
109 cooperate and influence each other. We hypothesized that the inactivation of SMG5-SMG7 should  
110 activate the SMG6-dependent NMD pathway and still permit normal NMD if both pathways are  
111 independent. However, we show here that the combined loss of SMG5-SMG7 completely inactivates

112 NMD. Contrary to our expectations, SMG6 was inactive in cells depleted of SMG5-SMG7, indicating  
113 that SMG6 is not independent and could not compensate for the loss of the deadenylation-  
114 dependent branch of NMD. This was especially surprising given that SMG6 was previously considered  
115 to be the dominant NMD-executing factor. Exploring the potential mechanism, we find that the  
116 deadenylation-promoting function of SMG7 can enhance target degradation but is in general  
117 dispensable for NMD. We propose a model, in which SMG5 and SMG7 recruitment to hyper-  
118 phosphorylated UPF1 acts as an additional licensing step required for SMG6-mediated degradation of  
119 the target transcript. This model of two-factor authentication explains the tight control of NMD on  
120 regular transcripts, which prevents the untimely access of endonucleolytic decay activities.

121

## 122 Results

### 123 NMD is impaired in SMG7 knockout cells

124 Phosphorylation of UPF1 represents a central checkpoint in NMD, which is followed by SMG6-  
125 mediated endonucleolytic cleavage and/or SMG5-SMG7-mediated deadenylation of the target  
126 transcript (Fig. 1a). We hypothesized that after deactivating the deadenylation-dependent NMD  
127 branch, the execution of NMD would rely exclusively on the activity of SMG6. To achieve this goal,  
128 we generated SMG7 knockout (KO) Flp-In-T-REx-293 cells and identified three clones lacking the  
129 SMG7-specific band in western blot analyses using three different antibodies (Fig. 1b and Extended  
130 Data Fig. 1a,b). In all clones, the SMG7 genomic locus contained different frame-shift inducing  
131 insertions/deletions, which also resulted in altered splicing of the CRISPR-targeted SMG7 exon.  
132 (Extended Data Fig. 1c-e). Phenotypically, the SMG7 KO clones proliferated slower compared to the  
133 WT cells, with no apparent decrease in cell survival (Extended Data Fig. 1f,g). These results indicate  
134 that the depletion of full-length SMG7 protein impairs cellular fitness, presumably due to reduced  
135 NMD capacity. To test if NMD is indeed impaired in SMG7 KO cells, we quantified the levels of two  
136 exemplary endogenous NMD targets. SRSF2 is a serine/arginine-rich (SR) splicing factor, which auto-  
137 regulates its expression by generating NMD-sensitive splice isoforms of its mRNA<sup>74</sup>. ZFAS1 is a  
138 snoRNA host mRNA with a short PTC-containing ORF, which was reported as an NMD target  
139 undergoing SMG6-dependent endocleavage<sup>70</sup>. The tested SMG7 KO clones (2 and 34), showed  
140 strongly upregulated levels of the ZFAS1 mRNA and the NMD-sensitive SRSF2 isoforms (Fig. 1c).  
141 Baseline levels of these NMD substrates were restored by expressing the wild type SMG7 protein  
142 from genomically integrated constructs. Importantly, the NMD defect was quantitatively more  
143 pronounced in the SMG7 KO cells compared to a siRNA-mediated knockdown (KD) of SMG7 in  
144 control cells (Fig. 1d).

145 To gain insights into the transcriptome-wide effects of the SMG7 depletion, we sequenced  
146 poly(A)+ enriched mRNA from both SMG7 KO clones and identified differentially expressed genes  
147 (Extended Data Fig. 2a and Supplementary Table 1). Consistent with the mRNA-degrading function of

148 SMG7 in NMD, more than twice as many genes were upregulated than downregulated in the SMG7  
149 KO cells ([Extended Data Fig. 2b](#)). Compared to a recently published study using SMG7 KD in HeLa  
150 cells<sup>14</sup>, this ratio of upregulated vs. downregulated genes was higher ([Extended Data Fig. 2c-e](#)). We  
151 observed a substantial overlap between upregulated genes in both SMG7 KO cell lines, indicating  
152 that these genes are high-confidence SMG7 targets. In contrast, only a limited overlap between  
153 downregulated genes could be detected, suggesting these are rather clone-specific effects or off-  
154 targets ([Extended Data Fig. 2b](#)). From these analyses and the small overall overlap of differentially  
155 expressed genes in SMG7 KO cells compared to the SMG7 KD in HeLa cells, we conclude that the  
156 complete SMG7 depletion leads to stronger NMD inhibition than the KD.

157 Next, we quantified alternative splicing events ([Supplementary Table 2](#)), as well as differential  
158 transcript usage and identified significant isoform switches ([Extended Data Fig. 2a](#) and  
159 [Supplementary Table 3](#)). Isoform switches are characterized by significant changes in the relative  
160 contribution of isoforms to the overall gene expression when comparing two conditions<sup>75</sup>. Because of  
161 the identification at the isoform level, this approach allows the identification of PTC-containing  
162 transcripts that are upregulated upon NMD inhibition. As a specific example of such an isoform  
163 switch, we visualized the read coverage for the previously used bona fide NMD target SRSF2. While  
164 the overall SRSF2 expression remained nearly unchanged, we detected prominent NMD-inducing  
165 exon inclusion and 3' UTR splicing events in the SMG7 KO but not in the SMG7 KD conditions ([Fig.](#)  
166 [1e](#)). We verified the SMG7-dependent upregulation of additional examples by end-point PCR  
167 ([Extended Data Fig. 2f-h](#)).

168 On a transcriptome-wide scale, NMD-sensitive isoforms with annotated PTC were almost  
169 exclusively detected to be upregulated in the SMG7 KO cells, which was not the case in the SMG7 KD  
170 in HeLa cells<sup>14</sup> ([Fig. 1f-i](#)). Whereas the functional overlap of isoform switches between the SMG7 KO  
171 clones was evident, only a mild enrichment compared to the published SMG7 KD data could be  
172 detected ([Extended Data Fig. 2i-k](#)). Collectively, the RNA-Seq data analysis supported the initial

173 observation that NMD is robustly impaired when SMG7 is knocked out. Due to the clear effect on  
174 NMD upon complete loss of SMG7, the KO cells provide an ideal background to examine further  
175 mechanistic details of NMD, which could not be studied before.

### 176 **SMG5 is required to maintain residual NMD in SMG7-depleted cells**

177 We utilized the SMG7 KO cells to investigate the molecular features and protein-protein  
178 interactions required by SMG7 to support NMD. Specifically, we aimed to confirm whether SMG7  
179 initially binds phosphorylated UPF1 (p-UPF1) and subsequently triggers deadenylation of the target  
180 mRNA via the recruitment of the CCR4-NOT complex (Fig. 1a). To this end, we generated stable  
181 SMG7 KO clone 2 cell lines that inducibly express SMG7 variants as rescue proteins. Whereas the wild  
182 type SMG7 was shown to fully rescue the NMD defect (Fig. 1c), the 14-3-3<sup>mut</sup> (unable to interact with  
183 p-UPF1)<sup>76</sup> was expected to be inactive (Fig. 2a). However, both wild type and mutant proteins  
184 efficiently restored NMD activity in the SMG7 KO cells (Fig. 2b). This suggests that the p-UPF1 binding  
185 is not absolutely critical for the function of SMG7 in NMD. Next, we investigated if SMG7 has to form  
186 a heterodimer with SMG5 for full NMD activity. Surprisingly, the expression of a G100E mutant of  
187 SMG7 (unable to interact with SMG5)<sup>62</sup> (Fig. 2c) failed to rescue the NMD defect (Fig. 2a,b). This  
188 finding was unexpected in the light of the currently advocated NMD model, in which SMG5 is merely  
189 a companion for SMG7 with the role to potentially strengthen the binding of the SMG5-SMG7  
190 heterodimer to p-UPF1<sup>62</sup>.

191 This finding prompted us to systematically address the question, which combinations of the  
192 three decay-inducing proteins SMG5, SMG6 and SMG7 are required for NMD (Fig. 2d). Single SMG5  
193 or SMG7 KDs in wild type 293 cells resulted in very mild or nearly undetectable inhibition of NMD  
194 (Fig. 2d; lanes 2 and 4), whereas depletion of SMG6 showed an intermediate effect, reflected by the  
195 upregulation of the SRSF2 NMD isoform and ZFAS1 (Fig. 2d; lane 3). Co-depletion of SMG6 and SMG5  
196 via siRNAs showed a similar inhibitory effect on NMD as the single SMG6 KD (Fig. 2d; lane 5 vs. lane  
197 3). As expected, KD of SMG6 in the SMG7 KO cells strongly abolished NMD activity, since both  
198 endonucleolytic and exonucleolytic pathways of NMD are inactivated (Fig. 2d; lane 8). Remarkably,

199 an even more dramatic NMD inhibition was achieved by depleting SMG5 in the SMG7 KO cells, which  
200 could not be further enhanced by the additional KD of SMG6 (Fig. 2d; lane 9 vs. lane 7). This result  
201 corroborates the failed rescue with the SMG7 G100E mutant and shows that the SMG5-SMG7  
202 heterodimer is critical for NMD, even when SMG6 is present. Therefore, these observations  
203 profoundly question the independence of the SMG5-SMG7 and SMG6 decay pathways and suggest a  
204 functional hierarchy in NMD execution.

### 205 **NMD is completely inhibited transcriptome-wide upon loss of SMG5-SMG7**

206 The strongly impaired NMD in cells depleted of SMG5 and SMG7 encouraged us to sequence  
207 mRNA from SMG7 KO cells (clones 2 and 34) with an additional SMG5 or SMG6 KD (Extended Data  
208 Fig. 3a). As expected for complete NMD inhibition, the combined depletion of SMG6 and SMG7  
209 resulted in massive changes of gene expression and isoform usage, which were qualitatively and  
210 quantitatively comparable to published SMG6-SMG7 double KD in HeLa cells<sup>14</sup> (Fig. 3a-c and  
211 Extended Data Fig. 3b-d). Whereas SMG5 KD in control cells had very mild effects on the  
212 transcriptome, downregulation of SMG5 in SMG7 KO cells exhibited equal or even more pronounced  
213 changes in gene expression and isoform usage compared to the SMG6-SMG7-depleted condition (Fig.  
214 3d-f and Extended Data Fig. 3e-g). As a representative example, the alternative splicing pattern of  
215 SRSF2 displayed a complete switch from the normal to NMD-sensitive isoforms when SMG5 or SMG6  
216 were depleted in SMG7 KO cells (Fig. 3g). Interestingly, the highest overlap of upregulated NMD-  
217 sensitive isoforms was found between both SMG7 KO cell lines with SMG5 or SMG6 KD, suggesting  
218 that these four conditions predominantly target the same transcripts (Extended Data Fig. 3h).

219 Intrigued by the remarkable changes in gene expression and isoform usage when NMD was  
220 completely inhibited, we wanted to re-examine the statement that about 10% of genes are affected  
221 by NMD. To this end, we calculated how many genes showed single or combined differential gene  
222 expression (DGE), differential transcript usage (DTU) or alternative splicing (AS) events when the  
223 SMG7 KO was combined with the KD of SMG5 or SMG6 (Fig. 3h). With this approach, we find that  
224 about 40% of the expressed genome in the Flp-In-T-REx-293 cells is under direct or indirect control of

225 NMD. With more stringent cutoffs for the analyses, still around 20% of all expressed genes were  
226 affected (**Extended Data Fig. 3i**), mostly those with medium to high expression levels (**Extended Data**  
227 **Fig. 3j**). Collectively, the RNA Seq analysis confirmed that SMG5 KD, as well as SMG6 KD, have similar  
228 effects on NMD in SMG7 KO cells. It also provided global evidence that the loss of the SMG5-SMG7  
229 heterodimer completely inactivates NMD and leads to massive changes in the expressed  
230 transcriptome.

### 231 **Loss of SMG5 and SMG7 prohibits endonucleolytic cleavage of NMD substrates**

232 The observed NMD inhibition upon the co-depletion of SMG5 and SMG7 suggests that SMG6 is  
233 equally inactivated, although it is widely assumed that SMG6 acts redundantly to and independently  
234 of SMG5-SMG7<sup>14,64</sup>. This unexpected result raised the question, whether SMG6 requires the presence  
235 of SMG5-SMG7 for endonucleolytic cleavage of its target mRNAs during NMD. We monitored the  
236 activity of SMG6 by northern blotting, which allows us to detect decay intermediates resulting from  
237 endonucleolytic or 5'-3' exonucleolytic degradation. To this end, stably integrated triosephosphate  
238 isomerase (TPI) mRNA reporters were expressed as wild type or NMD-inducing PTC160 variant in  
239 control or SMG7 KO cells with different combinations of siRNA-mediated knockdowns (**Fig. 4a**). The  
240 reporter mRNA also contained XRN1-resistant sequences (xrRNAs) in the 3' UTR that produce meta-  
241 stable intermediates of 5'-3' decay (called xrFrag) and thereby provided information about the extent  
242 and directionality of mRNA degradation<sup>72,77</sup>. Upon depletion of the major cytoplasmic 5'-3'  
243 exonuclease XRN1, SMG6-generated endonucleolytic cleavage products (designated 3' fragments) of  
244 the PTC-containing reporter mRNA are detected as an additional band (**Extended Data Fig. 4a**; lane  
245 6). Of note, the isolated SMG7 KO or SMG6 KD resulted in a slight accumulation of the full-length  
246 reporter (**Extended Data Fig. 4a**; lanes 8 and 10), indicating partial NMD inhibition consistent with the  
247 literature and our earlier observations. However, we did not observe increased 3' fragment levels  
248 upon loss of SMG7, which indicates that the SMG6 activity is not compensatory in the absence of  
249 SMG7 (**Fig. 4b** and **Extended Data Fig. 4a,b**; lane 14). While KD of SMG5 in control cells had no  
250 inhibitory effect on endonucleolytic cleavage, depletion of SMG5 in SMG7 KO cells completely

251 abolished the generation of 3' fragments (Fig. 4b and Extended Data Fig. 4b; lanes 4 and 8 vs. 12 and  
252 16). Furthermore, the accumulation of the PTC160 reporter mRNA to WT levels and the  
253 disappearance of the xrFrag band confirmed that NMD is completely inactivated in SMG5-SMG7-  
254 depleted conditions. The dramatic effect on the endonucleolytic cleavage activity was further  
255 confirmed by investigating the naturally occurring stable cleavage product of NOP56 (Fig. 4c)<sup>78</sup>. In the  
256 control cells, the cleavage product was predominantly present, but became undetectable in the  
257 SMG5-SMG7-depleted condition. Taken together, these results underline the previous observation  
258 that the SMG5-SMG7 heterodimer is required for general NMD activity and, surprisingly, also for  
259 SMG6 activity.

#### 260 **UPF1 phosphorylation and target-discrimination is altered upon SMG7 knockout**

261 The common denominator of SMG5-SMG7 and SMG6 in the NMD pathway is UPF1 serving as the  
262 binding platform on the target mRNA. Controlled phosphorylation cycles of UPF1 are required for  
263 functional NMD, since disturbed UPF1 dephosphorylation inhibits NMD<sup>52,53,60</sup>. While SMG5 and SMG7  
264 exclusively bind to phosphorylated UPF1<sup>53,60,62</sup>, SMG6 interacts with UPF1 also in a phosphorylation-  
265 independent manner<sup>63,79</sup>. Intriguingly, the p-UPF1 binding proteins SMG5 and SMG7 were implicated  
266 in the dephosphorylation of UPF1, potentially via the recruitment of the protein phosphatase 2A  
267 (PP2A)<sup>53,61,80,81</sup>. Therefore, we wanted to explore the possibility, that an altered UPF1  
268 phosphorylation status is responsible for the NMD inhibition in SMG5-SMG7-depleted cells. To this  
269 end, we expressed FLAG-tagged UPF1 wild type or a mutant lacking all N- and C-terminal potential  
270 phosphorylation sites (SQ-mut) in wild type or SMG7 KO cells (Fig. 4d). Wild type UPF1, but not the  
271 SQ-mutant, showed increased phosphorylation in the SMG7 KO cells, which did not increase further  
272 when SMG5 was depleted (Fig. 4e,f and Extended Data Fig. 5a). However, the overall amount of p-  
273 UPF1 in the SMG7 KO cells was relatively small in comparison to cells treated with okadaic acid, a  
274 potent inhibitor of protein phosphatase 2A (PP2A) (Extended Data Fig. 5a)<sup>52</sup>. These results confirm  
275 that SMG7 is involved in the dephosphorylation of UPF1. However, it seems unlikely that the



276 accumulation of hyperphosphorylated UPF1 represents the main reason for the complete inhibition  
277 of NMD and SMG6 activity in SMG5-SMG7 depleted cells.

278 Previous publications reported that SMG5 and SMG7 stabilise p-UPF1 binding to target mRNAs<sup>61</sup>  
279 and ATPase-deficient UPF1 mutants accumulate in a hyper-phosphorylated, SMG5-SMG7 bound  
280 state<sup>48</sup>. Intrigued by these reports, we next investigated whether the NMD target binding or  
281 recognition ability of UPF1 is impaired in SMG5-SMG7 depleted cells. To this end, we employed UPF1  
282 RNA immunoprecipitation (RIP) assays to study NMD target discrimination by UPF1<sup>48</sup>. Binding of  
283 UPF1 to two NMD targets, which displayed increased mRNA levels upon NMD inhibition (**Extended**  
284 **Data Fig. 5b,c**), remained unchanged in control, SMG7 KO, or SMG7 KO plus SMG5 KD conditions (**Fig.**  
285 **4g,h**). These results suggest that UPF1 is still able to identify and bind to NMD-targeted transcripts,  
286 although their degradation cannot be executed anymore. In contrast, non-NMD targets such as RLPO  
287 or EEF1A1, which are normally weakly or not at all bound by WT UPF1 (**Extended Data Fig. 5d,e**),  
288 exhibited stronger association with UPF1 in SMG7 KO cells (**Fig. 4i,j**). Of note, the impaired release of  
289 UPF1 from non-NMD targets resembles the behaviour of ATPase-deficient UPF1 (**Extended Data Fig.**  
290 **5d,e**). Although these results suggest that the loss of SMG7 impairs the target discrimination ability  
291 of UPF1, the additional KD of SMG5 did not substantially increase this effect (**Fig. 4i,j**). In summary,  
292 the depletion of SMG7 results in dysregulation of the UPF1 phosphorylation status and target  
293 discrimination, while no convincing evidence for additive effects of SMG5 knockdown on these  
294 defects were found.

### 295 **SMG7-mediated deadenylation is dispensable for NMD**

296 To gain mechanistic insight into the requirements of SMG5 and SMG7 for functional NMD, we  
297 repeated the SMG7 rescue experiments with additional combinations of rescue constructs and KDs  
298 of SMG5 or SMG6 (**Fig. 5a**). Consistent with our earlier observations, SMG7 WT rescued the SMG7  
299 defect in all conditions, whereas a 14-3-3<sup>mut</sup> / G100E double-mutation completely inactivated SMG7  
300 in the full-length context (**Fig. 5b**; lane 3 vs. lane 6). We were surprised that a SMG7 1-633 deletion  
301 mutant (unable to recruit the CCR4-NOT complex)<sup>64</sup> efficiently rescued NMD in SMG7 KO cells, even

302 when SMG5 or SMG6 were depleted in addition (Fig. 5b; lane 7). This result indicates that the  
303 deadenylation of NMD substrates by SMG7 is not required for their efficient degradation. In contrast  
304 to a previous report<sup>64</sup>, the C-terminus of SMG7 is not required for NMD even when SMG6 is  
305 downregulated. However, by combining the C-terminal truncation with either 14-3-3<sup>mut</sup> or G100E  
306 mutations, these SMG7 variants became less NMD-competent, especially in the SMG5 KD condition  
307 (Fig. 5b; lanes 4-5 vs. lanes 8-9). This observation suggests that the deadenylation-inducing activity  
308 might serve as an additive but dispensable feature that helps to clear NMD targets, especially when  
309 other features of SMG7 are inactivated.

310 Next, we performed co-IP experiments with the functionally tested set of FLAG-tagged SMG7  
311 constructs to analyse their steady-state interaction with UPF1 (Fig. 5c). The full-length or truncated  
312 14-3-3<sup>mut</sup> protein was unable to co-IP UPF1, consistent with the role of the 14-3-3 like domain to  
313 mediate the interaction with phosphorylated UPF1 (Fig. 5c; lane 2 vs. lanes 3 and 7)<sup>63,79</sup>. In turn, this  
314 result also indicates that SMG5 does not bridge the 14-3-3<sup>mut</sup> SMG7 protein to UPF1. Interestingly,  
315 the G100E mutants co-immunoprecipitated more UPF1 than the respective wild type construct (Fig.  
316 5c; lanes 2,6 vs lanes 4,8). This finding confirms the assumption that SMG7 does not require the  
317 heterodimerization with SMG5 to interact with UPF1<sup>62</sup>. In conjunction with the failed functional  
318 rescue of the G100E mutants, this result implies that despite prominent UPF1-SMG7 binding, the  
319 interaction of SMG7 with SMG5 might be important to advance in the NMD process.

### 320 **SMG5 functionally complements the loss of SMG7**

321 These unexpected observations concerning SMG7 prompted us to investigate the molecular  
322 properties of SMG5. Specifically, we aimed to identify which function of SMG5 is required to support  
323 NMD in the absence of SMG7 (Fig. 6a). The first striking result was the almost complete rescue of the  
324 SMG7 depletion phenotype by the expression of SMG5 WT or G120E mutant (unable to interact with  
325 SMG7)<sup>62</sup> in control or SMG5 KD conditions (Fig. 6b; lanes 3 and 5). This finding was very surprising,  
326 given that SMG5 has no reported ability to support NMD directly. Although SMG5 could potentially  
327 execute endonucleolytic cleavage via the PiLT N-terminus (PIN) domain that structurally resembles

328 the functional PIN domain of SMG6, two of the three required catalytic residues are missing in the  
329 inactive C-terminal SMG5 PIN domain (Fig. 6a)<sup>82</sup>. SMG5 was also shown in initial reports to directly  
330 recruit decapping factors, which could explain the NMD activity we observe in the rescue assays<sup>83</sup>.  
331 However, later studies could not confirm this path of SMG5-dependent decapping and rather  
332 pointed to UPF1 directly interacting with general decapping factors<sup>64,65</sup>.

333 Altogether, the observation of SMG5 expression rescuing the loss of SMG7 once more questions  
334 the relevance of the SMG7 deadenylation-promoting function for NMD. We hypothesized that in the  
335 absence of SMG7, SMG5 might rely on its N-terminal 14-3-3-like domain to interact with p-UPF1 to  
336 activate NMD. In line with this hypothesis, mutating three residues in the potential phosphopeptide  
337 binding pocket of SMG5 severely affected the ability of SMG5 to rescue the SMG7 KO phenotype in  
338 control or SMG5 KD conditions (Fig. 6b; lane 4). This result indicates that either the interaction  
339 between SMG5 and UPF1 per se suffices to rescue NMD or once this interaction is established,  
340 another function of SMG5 is required to maintain NMD capacity. To test these ideas, we generated a  
341 SMG5 deletion mutant lacking the C-terminal PIN domain (Fig. 6a), which should still be able to  
342 interact with UPF1. This SMG5 construct comprising the first 853 amino acids was unable to restore  
343 NMD activity (Fig. 6b; lane 6), suggesting that the catalytically inactive PIN domain of SMG5 is  
344 essential to support NMD. In search of an explanation, we considered early reports that the C-  
345 terminus of SMG5 might be involved in the dephosphorylation of UPF1, likely by direct recruitment  
346 of the PP2A complex<sup>53,60</sup>. Although we did not observe further hyper-phosphorylation of UPF1 in the  
347 SMG7 KO plus SMG5 KD cells (Fig. 4e,f), we cannot exclude a function of SMG5 in the process of  
348 UPF1 dephosphorylation. Conceivably, the residual SMG5 proteins left after the KD are sufficient to  
349 counteract further UPF1 hyper-phosphorylation, whereas NMD cannot be supported anymore.

350 Finally, we were intrigued by the fact that both SMG5 and SMG7 wildtype proteins can  
351 individually rescue the SMG7 KO phenotype. Specifically, we wondered if the main NMD-supporting  
352 function of both factors could be to enable SMG6-mediated endonucleolytic cleavage of the target

353 mRNA. To test this hypothesis, we used the NOP56 cleavage product as an indicator for SMG6  
354 activity, since the generation of this meta-stable RNA fragment was shown to be strongly SMG6-  
355 dependent<sup>78</sup>. All SMG5 and SMG7 rescue proteins that restored full NMD activity also resulted in  
356 normal NOP56 cleavage pattern, indicating that SMG6 was reactivated in these cells (Fig. 6c). Based  
357 on these results, we postulate that SMG5 and SMG7 maintain NMD competence by permitting the  
358 activation of SMG6.

359

## 360 Discussion

361 The correct execution of NMD not only prevents the production of aberrant gene products, but also  
362 shapes the transcriptome on a global scale<sup>43</sup>. NMD is generally perceived as a robust, but highly  
363 dynamic process that integrates different inputs, including mRNP composition and translational  
364 status, in order to efficiently identify and remove transcripts that appear to be faulty<sup>42</sup>. Multiple RNA  
365 degradation pathways can be employed after identification of target transcripts, which are all  
366 centred around the key factor UPF1 and provide reliable elimination of the mRNA. UPF1 can directly  
367 or indirectly interact with the general mRNA decapping complex<sup>64,83-87</sup>, which could enhance the  
368 degradative power of NMD, but the major decay paths during NMD utilize the UPF1-recruited SMG5-  
369 SMG7 and SMG6. Although evidence pointed to the independence of these branches in the past, we  
370 show here that SMG6 cannot endonucleolytically cleave NMD substrates in cells lacking the SMG5-  
371 SMG7 heterodimer (Fig. 4 and Extended Data Fig. 4), resulting in complete NMD inactivation.  
372 Therefore, functional dependence and hierarchy exists between both pathways.

373 The reason why this dependency has not been detected so far has probably technical reasons.  
374 Virtually all previous experiments that address the interplay between SMG5, SMG6 and SMG7  
375 utilized individual or combined gene silencing of NMD factors depending on siRNA- or shRNA-  
376 mediated knockdown. As reported before, the downregulation of SMG5 and/or SMG7 by  
377 knockdowns only slightly impairs NMD<sup>35,62</sup>. We show here that a complete and sustained depletion of  
378 SMG7 is needed to detect a considerable NMD defect (Fig. 1 and Extended Data Fig. 1). This  
379 condition is not achieved by SMG7 knockdown approaches. Furthermore, the downregulation of  
380 SMG5 substantially affects NMD activity only in the SMG7 KO conditions (Fig. 3 and Extended Data  
381 Fig. 3). Therefore, we propose that a conventional downregulation of the SMG5-SMG7 heterodimer  
382 is not sufficient to abolish its function. It was reported before that SMG5 and SMG7 form stable and  
383 long-living complexes<sup>35</sup> and residual heterodimers could potentially outlive the experimental  
384 timeframe of knockdown experiments. Remarkably, strongly reduced levels of the SMG5-SMG7  
385 heterodimer after knockdown are still able to support NMD, although both proteins are about two

386 orders of magnitude less abundant than UPF1<sup>88,89</sup>. This observation indicates that the basal levels of  
387 SMG5 and SMG7 provide enough buffer capacity to tolerate the partial loss of individual NMD factors  
388 or to cope with increasing amounts of NMD targets, e.g., resulting from reduced transcriptomic  
389 fidelity. In line with this idea, previous attempts to “overload” the NMD machinery by transiently  
390 overexpressing large quantities of NMD substrates did not result in reduced NMD activity<sup>90</sup>.

391 The remarkable capacity of the NMD process is also reflected in the amount of differentially  
392 regulated transcripts that accumulate in cells with inactive NMD. Earlier studies estimated that about  
393 5-10 % of all human genes are directly or indirectly influenced by NMD<sup>9,12-15</sup>. If we consider gene- and  
394 isoform-specific effects (differential gene expression, isoform switches, alternative splicing), we find  
395 that between 20 and 40 % of the expressed genes are affected by NMD. These values are  
396 considerably higher than previous estimates, which can be partially explained by using state-of-the-  
397 art RNA-sequencing methods and recent bioinformatic algorithms, allowing a more thorough analysis  
398 of the transcriptomic alterations. Furthermore, we believe that the SMG7 KO cells in combination  
399 with SMG5 or SMG6 KD result a more efficient NMD inhibition, which could not be achieved with  
400 previous attempts based on RNA interference alone. Admittedly, not all of the detected changes in  
401 NMD-incompetent cells are direct effects of NMD inhibition, since the misregulation of targets such  
402 as the splicing factor SRSF2 will undoubtedly cause secondary effects on the transcriptome. However,  
403 the large number of NMD-regulated genes can explain why NMD is essential for cell survival,  
404 proliferation and differentiation. It is difficult to imagine that important and fundamental biological  
405 processes can function normally without being influenced by the 20-40 % NMD-regulated genes.

406 Given this large amount of potential cellular NMD substrates, it will be important in the future to  
407 identify and characterize which mRNA isoforms are authentic NMD-regulated transcripts. This will  
408 also help to understand the process of NMD better and establish further rules for NMD activating  
409 features<sup>91</sup>.

410 On a conceptual level, NMD identifies and degrades transcripts that fail to pass quality control  
411 standards. To this end, the NMD pathway makes use of a multitude of potent cytoplasmic RNA

412 degradation tools, such as the endonuclease SMG6. However, the access to and application of these  
413 tools must be very tightly controlled to minimise spurious degradation of normal transcripts. This  
414 control is especially important, since NMD probably monitors every translation termination event  
415 and uncontrolled SMG6-mediated mRNA cleavage would be catastrophic for the cell. Based on the  
416 intensive previous work of several different labs and the data presented in this study, we propose an  
417 improved model for the activation of NMD with the ambition to integrate and explain as many earlier  
418 observations as possible. In our opinion, this can best be accomplished with a two-factor  
419 authentication model (Fig. 7). In this model, UPF1 serves as a general surveillance factor, which has  
420 to successfully pass at least two different consecutive authentication procedures on true NMD  
421 targets to gain access to SMG6-mediated activity.

422 By analogy, we envision that UPF1 acts as a molecular inspector, which is routinely assigned to control  
423 the quality of all “end-of-line” transcripts that are translated (Fig. 7a). It has become increasingly clear  
424 that the mere binding of UPF1 to an mRNA does not trigger its degradation. This would be in agreement  
425 with previous informal names for UPF1 that signify its main function, such as “time bomb” or  
426 “kinetic/molecular clock”<sup>4,59,92</sup>. These names indicate that the residence time of UPF1 on a given mRNA  
427 influences NMD activity. Accordingly, UPF1 has to be removed from the transcript in a timely manner  
428 to prevent NMD in the first place. Towards this goal, translating ribosomes remove most of the RNA-  
429 bound UPF1 and only those in the 3’ UTR remain attached to the transcript<sup>44-47</sup>. Furthermore, efficient  
430 and proper translation termination probably leads to the activation of the UPF1 ATPase and helicase  
431 function, resulting in the dissociation of UPF1 from the transcript<sup>48</sup> (Fig. 7b-d). The precise molecular  
432 mechanism for this termination-dependent UPF1 activation is still largely enigmatic. Either the  
433 ribosome itself, the translation termination factors or certain proteins located in the 3’ UTR such as  
434 cytoplasmic poly-A binding protein 1 (PABPC1) and polypyrimidine tract binding protein 1 (PTBP1) may  
435 contribute to release UPF1 from authentic mRNAs<sup>93-96</sup>. Therefore, proper usage of the transcript for  
436 protein production sufficiently convinces the inspector UPF1 that the mRNA is legitimate, resulting in  
437 UPF1 being released for another round of inspection (Fig. 7a-d).

438 When translation terminates inefficiently or at aberrant positions (e.g., upstream of an EJC), the  
439 residence time of UPF1 increases, probably due to the lack of strong UPF1 ATPase/helicase activation  
440 (Fig. 7b,e). At this point, the first authentication step is installed, which is the progressive SMG1-  
441 mediated phosphorylation of UPF1 (Fig. 7f,g). It has been shown that SMG1 associates with and  
442 phosphorylates UPF1 preferentially in the presence of UPF2<sup>50,52,57,58,97</sup>, which in turn also alters the  
443 conformation and helicase activity of UPF1 upon binding<sup>48,98</sup>. The presence of the EJC and UPF3, which  
444 binds to the EJC, is thought to further enhance the kinase activity of SMG1<sup>50</sup>. Finally, SMG1-mediated  
445 UPF1 phosphorylation is also controlled by DHX34, SMG8, SMG9 and potentially other auxiliary NMD  
446 factors<sup>54-56,58,99</sup>. All these regulatory mechanisms ensure that UPF1 is only phosphorylated when bound  
447 to positions on the mRNA, where an NMD-activating arrangement of mRNP features is present.  
448 Effectively, the inspector (UPF1) remains attached to the transcript and persisting NMD-activating  
449 features will cumulatively lead to hyper-phosphorylated UPF1 (Fig. 7g). To stick to our previous theme,  
450 the inspector gets increasingly suspicious that the bound mRNA may be defective.

451 Notably, earlier reports described that specific phosphorylated residues in the UPF1 N- and C-  
452 terminus are critical binding sites for SMG6 and SMG5-SMG7, respectively<sup>50,60,76</sup>. According to this  
453 rather rigid concept, degradation could be efficiently induced by even a single UPF1 phosphorylation  
454 event. In particular, this is problematic with respect to SMG6, whose recruitment to a barely  
455 phosphorylated UPF1 could lead to an untimely endonucleolytic cleavage that cannot be undone.  
456 Therefore, we favour the recently emerging view that gradually increasing UPF1 phosphorylation at  
457 multiple sites increases the chance for NMD execution<sup>59</sup>.

458 The combination of UPF1 residence time on a given transcript and phosphorylation status allows for  
459 a graduated NMD response. Strong NMD activating features, such as downstream EJCs, efficiently  
460 activate SMG1, leading to hyper-phosphorylated UPF1 within a short time frame. In contrast,  
461 transcripts with weaker NMD-activating features, such as long 3' UTRs, likely require longer time  
462 and/or translation cycles to accumulate moderately phosphorylated UPF1. Conceptionally, this  
463 graduated response allows the rapid degradation of true NMD targets (e.g., PTC-containing



464 transcripts), whereas regular transcripts can be regulated in their expression with varying intensity.  
465 Therefore, the first authentication step of NMD does not follow a simple “on/off” scheme, but rather  
466 allows for large regulatory flexibility, as was recently proposed<sup>42</sup>.

467 How is the increasing phosphorylation ultimately converted to an appropriate mRNA degradation  
468 response? We propose, based on the existing literature and our data, that a second authentication  
469 procedure must be passed to gain access to and/or activate SMG6 (Fig. 7h). Accordingly, we envision  
470 an interaction of SMG5-SMG7 with phosphorylated UPF1 as an essential step to permit SMG6-  
471 mediated endonucleolytic cleavage of the target mRNA. The evidence supporting this hypothesis is  
472 foremost the complete NMD inhibition in SMG5-SMG7-depleted cells, with no detectable SMG6-  
473 activity (Fig. 7i). Furthermore, the transcriptomic changes are highly similar between loss of the  
474 SMG5-SMG7 heterodimer and the combined SMG7 KO with SMG6 KD, indicating the same functional  
475 outcome. This observation is in good agreement with the previously reported extensive redundancy  
476 between SMG6 and SMG7<sup>14</sup>. Further support for this model comes from the observation that hyper-  
477 phosphorylation alone is not sufficient to induce NMD, as ATPase-deficient UPF1 mutants are  
478 phosphorylated but do not support NMD<sup>42,50,59</sup>. Accordingly, we observed increased UPF1  
479 phosphorylation in SMG7 KO cells, despite NMD being impaired.

480 According to this idea of a second authentication step, SMG6 would remain inactive until SMG5-  
481 SMG7 sensed that UPF1 is sufficiently phosphorylated (Fig. 7i). This poses the question, how the  
482 access of SMG6 to UPF1 can be controlled? Although SMG6 contains a 14-3-3-like domain and was  
483 proposed to interact directly with UPF1 via phosphorylation-dependent binding<sup>60</sup>, a phosphorylation-  
484 independent interaction between SMG6 and UPF1 was reported afterwards<sup>63,79,100</sup>. If this  
485 phosphorylation-independent interaction were sufficient to activate SMG6-mediated  
486 endonucleolytic cleavage, uncontrolled NMD would be observed. Therefore, we propose that the  
487 phosphorylation-dependent interaction of SMG5-SMG7 with UPF1 may lead to conformational  
488 changes of UPF1, allowing the transient binding and activity of SMG6 on *de facto* authenticated NMD  
489 targets (Fig. 7j). The key to this process could be the spatial arrangements of the accessory domains

490 of UPF1. Especially the C-terminally located SQ-region is of interest, as this region was shown to  
491 intra-molecularly interact with the helicase domains of UPF1, leading to repression of helicase  
492 activity<sup>101</sup>. Intriguingly, this SQ-region, as well as the helicase domain, were reported to mediate the  
493 phosphorylation-independent interaction between UPF1 and SMG6<sup>63,79</sup>. It is an attractive hypothesis  
494 that SMG5-SMG7-induced dissociation of this SQ-region from the helicase core not only allows the  
495 execution of endonucleolytic cleavage by SMG6, but also initiates the ATPase-driven removal of UPF1  
496 from the target. This mode of action would ensure that correctly completed NMD also releases UPF1  
497 from the now partially degraded transcripts, which is required to recycle UPF1 and permit XRN1-  
498 mediated elimination of the NMD target (Fig. 7k)<sup>102</sup>. On the other hand, this complex sequence of  
499 events would ensure that UPF1 remains locked on transcripts that require further inspection until a  
500 decision has been made to either release the inspector UPF1 or to degrade the mRNA. Therefore, in  
501 the absence of SMG5-SMG7, phosphorylated UPF1 molecules would accumulate on RNA, being  
502 unable to dissociate from the mRNA or to initiate target degradation. This interpretation fits with our  
503 UPF1-RIP results and represents an intriguing difference compared to ATPase-deficient UPF1, which  
504 was reported to degrade one target molecule, but simply cannot leave this target<sup>102</sup>.

505 This model undoubtedly raises questions about the molecular function of SMG5 and SMG7, the need  
506 to form a SMG5-SMG7 heterodimer, and the mode of SMG5-SMG7 interaction with p-UPF1. Our  
507 detailed analysis of SMG5 and SMG7 revealed interesting and unexpected insights into the function  
508 of these two proteins. Most impressively, the two proteins seem to exhibit a certain redundancy,  
509 because SMG5 or SMG7, respectively rescue the combined SMG5-SMG7 depletion. However,  
510 multiple lines of evidence in the past pointed to SMG7 as the dominant and functional component of  
511 the SMG5-SMG7 heterodimer. For example, SMG7 can interact with UPF1 even when SMG5 is  
512 downregulated or when the binding to SMG5 is impaired (e.g., by the G100E mutant; confirmed in  
513 Figure 5C)<sup>62</sup>. Furthermore, SMG7 contributes to the turnover of the target mRNA by recruiting the  
514 CCR4-NOT complex<sup>64</sup>. In contrast, the results of our rescue experiments question this SMG7-  
515 centered, deadenylation-dependent model. The 1-633 SMG7 deletion mutant, which lacks the CCR4-

516 NOT interaction, could efficiently rescue the SMG7 KO phenotype, even when SMG5 was co-  
517 depleted. Therefore, and per our model, the main function of SMG5-SMG7 cannot simply be the  
518 recruitment of deadenylation-promoting factors. This interpretation is in line with our result that  
519 SMG5 alone can replace SMG7, although SMG5 neither possesses a functional PIN domain<sup>82</sup> nor  
520 interacts with deadenylating complexes. Also, SMG7 1-633 rescues as efficiently as the full-length  
521 SMG7 protein when SMG6 is co-depleted, which does not fit with the hypothesis that the SMG7 C-  
522 terminus functions redundantly with SMG6<sup>64</sup>. Remarkably, the failed functional rescue, but increased  
523 amount of co-immunoprecipitated UPF1 with the SMG7 G100E mutant suggests that strong SMG7-  
524 UPF1 binding does not necessarily enhance NMD and that SMG5 plays a more important role than  
525 previously anticipated.

526 What could be the molecular function of SMG5 in NMD? Previous data showed that despite having a  
527 14-3-3-like domain, SMG5 cannot stably interact with p-UPF1 in the absence of SMG7<sup>62</sup> and SMG5  
528 cannot use the C-terminal PIN domain to eliminate transcripts due to missing catalytic residues<sup>82</sup>.  
529 This raises the question, how SMG5 expression is able to rescue the SMG7 KO (Fig. 6). One important  
530 aspect that has not been covered in the above-discussed model is the dephosphorylation of UPF1.  
531 After completion of NMD, hyper-phosphorylated UPF1 will be present either in free or RNA-bound  
532 form. Before this p-UPF1 can be reused for another inspection cycle, it has to be dephosphorylated.  
533 Evidence from *C. elegans* and human cell culture suggested that SMG5 induces the UPF1  
534 dephosphorylation via recruitment of the PP2A phosphatase complex<sup>53,60,80,103</sup>. Intriguingly, we find  
535 that deleting the C-terminal PIN domain, which was reported to be involved in dephosphorylation of  
536 UPF1, completely abolishes the rescue activity of SMG5. It remains to be determined whether the  
537 SMG5 PIN domain directly recruits the PP2A complex, as no such interaction was reported in recent  
538 SMG5 mass spectrometry experiments<sup>65</sup>. In support of the functional relevance of SMG5 in NMD, it  
539 was recently found that the SMG5 homolog in *Drosophila melanogaster* is critical for NMD activity<sup>104</sup>.  
540 Of note, no SMG7 homolog exists in *Drosophila*<sup>81,105</sup>, which could explain the strong dependence on  
541 SMG5.

542 The last unclear aspect is how SMG5 gains access to p-UPF1. In normal conditions, this interaction is  
543 bridged via SMG7<sup>62</sup>. In the absence of SMG7, a transient interaction between SMG5 and p-UPF1 is  
544 likely required not only to activate UPF1 for SMG6-mediated endonucleolytic cleavage, but also to  
545 trigger subsequent UPF1 dephosphorylation. In line with this hypothesis, the rescue efficiency of  
546 SMG5 14-3-3<sup>mut</sup> was clearly reduced.

547 In conclusion, we present here a detailed model for the activation of NMD, which aimed to integrate  
548 our insights into the inter-dependency of SMG5, SMG6 and SMG7 with the extensive existing  
549 knowledge. This model is centred on UPF1 as molecular mRNA inspector and involves progressive  
550 SMG1-mediated phosphorylation as first, and SMG5-SMG7-mediated activation/recycling of UPF1 as  
551 second authentication step to identify and degrade NMD targets in a complex transcriptome. The  
552 new arrangement of NMD factors in our model creates ample opportunities to investigate their  
553 function and interplay and allows the field to move away from earlier models, which were based on  
554 parallel or redundant degradation pathways during NMD.

555

## 556 **Online Methods**

### 557 **Cell lines**

558 Flp-In-T-REx-293 (human, female, embryonic kidney, epithelial; Thermo Fisher Scientific) cells were  
559 cultured in high-glucose, GlutaMAX DMEM (Gibco) supplemented with 9% fetal bovine serum (Gibco)  
560 and 1x Penicillin Streptomycin (Gibco). The cells were cultivated at 37°C and 5% CO<sub>2</sub> in a humidified  
561 incubator. The generation of knockout and stable cell lines is described below and all cell lines are  
562 summarized in [Supplementary Table 4](#).

### 563 **Generation of knockout cells using CRISPR-Cas9**

564 The knockouts were performed using the Alt-R CRISPR-Cas9 system (Integrated DNA  
565 Technologies) and reverse transfection of a Cas9:guideRNA ribonucleoprotein complex using  
566 Lipofectamine RNAiMAX (Thermo Fisher Scientific) according to the manufacturer's protocol. The  
567 crRNA sequence (Design ID: Hs.Cas9.SMG7.1.AD; Integrated DNA Technologies) to target SMG7 was  
568 /AITR1/rGrArArArArUrGrCrUrArGrUrUrArCrCrGrArUrUrGrUrUrUrArGrArGrCrUrArUrGrCrU/AITR2/.  
569 Reverse transfection was performed on  $1.5 \times 10^5$  cells per crRNA in 12-well plates. 48 h after  
570 transfection the cells were trypsinised, counted and seeded at a mean density of a single cell per well  
571 in 96-well plates. Cell colonies originating from a single clone were then screened via Western blot  
572 and genome editing of SMG7 was analysed on the genomic level via DNA extraction and Sanger  
573 sequencing. Alterations on the transcript level were analysed via RNA extraction followed by reverse  
574 transcription and Sanger sequencing.

### 575 **DNA and RNA extraction**

576 One day prior to DNA extraction,  $2.5 \times 10^5$  cells were seeded in a 6-well plate. To extract DNA,  
577 QuickExtract DNA Extraction Solution (Lucigen) was used following the manufacturer's instructions.  
578 RNA was isolated using peqGOLD TriFast (VWR Peqlab) following the manufacturer's instructions.  
579 Following changes were made: Instead of 200  $\mu$ l chloroform, 150  $\mu$ l 1-Bromo-3-chloropropane  
580 (Molecular Research Center, Inc.) was used. RNA was resuspended in 20  $\mu$ l RNase-free water.

## 581 **Immunoblot analysis**

582 SDS-polyacrylamide gel electrophoresis and immunoblot analysis were performed using protein  
583 samples harvested with RIPA buffer (50 mM Tris/HCl pH 8.0, 0.1% SDS, 150 mM NaCl, 1% IGEPAL, 0.5%  
584 deoxycholate) or samples eluted from Anti-FLAG M2 magnetic beads. For protein quantification, the  
585 Pierce Detergent Compatible Bradford Assay Reagent (Thermo Fisher Scientific) was used. All  
586 antibodies (see Key Resources List) were used at the indicated dilutions in 50 mM Tris [pH 7.2], 150  
587 mM NaCl with 0.2% Tween-20 and 5% skim milk powder. Amersham ECL Prime Western Blotting  
588 Detection Reagent (GE Healthcare) in combination with the Fusion FX-6 Edge system (Vilber Lourmat)  
589 was used for visualization. All antibodies used in this study are listed in [Supplementary Table 4](#). Protein  
590 bands detected with the Fusion FX-6 Edge system (Vilber Lourmat) were quantified in a semi-  
591 automated manner using the ImageQuant TL 1D software with a rolling-ball background correction.  
592 The control condition was set to unity, quantification results are shown as data points and mean.

## 593 **Growth assay**

594 To measure growth and mortality rate of cells, CytoTox-Glo Cytotoxicity Assay (Promega) was  
595 performed. 10,000 cell/well were seeded in a 96-well plate and assay was performed after 0-5 days  
596 using luminometer centro XS3 LB 960 (Berthold Technologies) following the manufacturer's  
597 instructions.

## 598 **Stable cell lines and plasmids**

599 The point and deletion mutants of SMG7 were PCR amplified using Q5 polymerase (New England  
600 Biolabs) and inserted with an N-terminal FLAG-tag via NheI and NotI (both New England Biolabs)  
601 restriction sites into PB-CuO-MCS-IRES-GFP-EF1 $\alpha$ -CymR-Puro (System Biosciences). Accordingly,  
602 N-terminally FLAG-tagged GST, UPF1 WT and UPF1 SQ N/C-terminal mutant (generated with  
603 Integrated DNA Technologies gBlocks and PCR amplification) were cloned via NheI and NotI into PB-  
604 CuO-MCS-BGH-EF1-CymR-Puro, which was modified from the original vector by replacing the IRES-GFP  
605 cassette with a BGH polyA signal.

606 The point and deletion mutants of SMG5 were PCR amplified using Q5 polymerase and inserted  
607 with an N-terminal FLAG-tag via NheI and NotI restriction sites into the tetracycline inducible  
608 pcDNA5/FRT/TO vector (Thermo Fisher Scientific). The mRNA reporter constructs TPI-WT and TPI-  
609 PTC160 in the pcDNA5/FRT/TO vector are available on Addgene (IDs 108377-108378).

610 The cells were stably transfected using the PiggyBac Transposon system (SMG7, UPF1, GST) or  
611 using the Flp-In T-REx system (SMG5, mRNA reporter).  $2.5\text{-}3 \times 10^5$  cells were seeded 24 h before  
612 transfection in 6-wells. For PiggyBac stable cells, 2  $\mu\text{g}$  of PiggyBac construct was transfected together  
613 with 0.8  $\mu\text{g}$  of the Super PiggyBac Transposase expression vector (System Biosciences) and for Flp-In  
614 T-REx stable cells, 1-2  $\mu\text{g}$  of pcDNA5 construct was transfected together with 1  $\mu\text{g}$  of the Flp  
615 recombinase expressing plasmid pOG44, using the calcium phosphate method. 48 h after transfection,  
616 the cells were transferred into 10 cm dishes and selected with 2  $\mu\text{g ml}^{-1}$  puromycin (InvivoGen) for  
617 PiggyBac or 100  $\mu\text{g ml}^{-1}$  hygromycin (InvivoGen) for Flp-In T-REx. After 7-10 days, the colonies were  
618 pooled. Expression of the PiggyBac constructs was induced with 30  $\mu\text{g ml}^{-1}$  cumate, Flp-In T-REx  
619 constructs were induced with 1  $\mu\text{g ml}^{-1}$  doxycycline. All vectors used in this study are listed in  
620 [Supplementary Table 4](#).

621 Mycoplasma contamination was tested by PCR amplification of mycoplasma-specific genomic  
622 DNA<sup>106</sup> or by using the Mycoplasmacheck service (Eurofins Genomics).

### 623 **Reverse transcription, end-point and quantitative RT-PCR**

624 1-4  $\mu\text{g}$  of total RNA was reverse-transcribed in a 20  $\mu\text{l}$  reaction volume with 10  $\mu\text{M}$  VNN-(dT)<sub>20</sub>  
625 primer using the GoScript Reverse Transcriptase (Promega). 2 % of cDNA was used as template in end-  
626 point PCRs using the GoTaq Green Master Mix (Promega) or MyTaq Red Mix (Bioline) and 0.2 – 0.6  $\mu\text{M}$   
627 final concentration of sense and antisense primer ([see Supplementary Table 4 for sequences](#)). After 30  
628 PCR cycles, the samples were resolved by electrophoresis on ethidium bromide-stained, 1-2% agarose  
629 TBE gels and visualized by trans-UV illumination using the Gel Doc XR+ (Bio-Rad). Representative gel  
630 images from at least three independent experiments are shown.

631 Bands detected in agarose gels from the indicated biological replicates of end-point PCRs were  
632 quantified using the Image Lab 6.0.1 software (Bio-Rad). Results of the indicated band % per lane are  
633 shown as data points and mean. Sanger sequencing of individual bands was performed using the  
634 service of Eurofins Genomics.

635 Quantitative RT-PCR were performed with the GoTaq qPCR Master Mix (Promega) using 2 % of  
636 cDNA in 10  $\mu$ l reactions, 0.2-0.6  $\mu$ M final concentration of sense and antisense primer (see  
637 [Supplementary Table 4](#) for sequences), and the CFX96 Touch Real-Time PCR Detection System (Bio-  
638 Rad). The reactions for each biological replicate were performed in duplicates or triplicates and the  
639 average Ct (threshold cycle) value was measured. For alternative splicing events, values for canonical  
640 isoforms were subtracted from values for NMD sensitive isoforms to calculate the  $\Delta$ Ct. For  
641 differentially expressed targets, the values for the housekeeping genes C1orf43 were subtracted from  
642 values for the target to calculate the  $\Delta$ Ct. The mean log<sub>2</sub> fold changes were calculated from three  
643 biologically independent experiments. Log<sub>2</sub> fold change results are shown as data points and mean.

#### 644 **siRNA-mediated knockdowns**

645 Cells were seeded in 6-well plates at a density of 2- 3x10<sup>5</sup> cells per well and reverse transfected  
646 using 2.5  $\mu$ l Lipofectamine RNAiMAX and 60 pmol of the respective siRNA(s) according to the  
647 manufacturer's instructions. In preparation for 3' fragment linker ligation, UPF1 phosphorylation and  
648 RNA immunoprecipitation (RIP) assays, 3x10<sup>6</sup> cells were reverse transfected in 10 cm dishes using  
649 6.25  $\mu$ l Lipofectamine RNAiMAX and 150-200 pmol siRNA. All siRNAs used in this study are listed in  
650 [Supplementary Table 4](#).

#### 651 **RNA-Sequencing and computational analyses**

652 RNA-Seq experiments were carried out with Flp-In-T-REx-293 wild type (WT) cells transfected with  
653 Luciferase or SMG5 siRNA and the SMG7 KO clones 2 and 34 transfected with either Luciferase, SMG5  
654 or SMG6 siRNAs. Three biological replicates were analysed for each sample. Total RNA was extracted  
655 using peqGOLD TriFast (VWR Peqlab) as described above.



656 The Lexogen SIRV Set1 Spike-In Control Mix (SKU: 025.03) that provides a set of external RNA  
657 controls was added to the total RNA to enable performance assessment. Mix E0 was added to samples  
658 with Luciferase siRNA, mix E1 was added to samples with SMG5 siRNA and mix E2 samples with SMG6  
659 siRNA. The Spike-Ins were used for quality control purposes, but not used for the final analysis of DGE,  
660 DTU or AS.

661 The library preparation was performed with the TruSeq mRNA Stranded kit (Illumina). After poly-  
662 A selection (using poly-T oligo-attached magnetic beads), mRNA was purified and fragmented using  
663 divalent cations under elevated temperature. The RNA fragments underwent reverse transcription  
664 using random primers. This is followed by second strand cDNA synthesis with DNA Polymerase I and  
665 RNase H. After end repair and A-tailing, indexing adapters were ligated. The products were then  
666 purified and amplified to create the final cDNA libraries. After library validation and quantification  
667 (Agilent tape station), equimolar amounts of library were pooled. The pool was quantified by using the  
668 Peqlab KAPA Library Quantification Kit and the Applied Biosystems 7900HT Sequence Detection  
669 System and sequenced on an Illumina NovaSeq6000 sequencing instrument and a PE100 protocol.

670 Reads were aligned against the human genome (version 38, GENCODE release 33 transcript  
671 annotations supplemented with SIRVomeERCCome annotations from Lexogen; obtained from  
672 <https://www.lexogen.com/sirvs/download/>) using the STAR read aligner (version 2.7.3a)<sup>107</sup>. Transcript  
673 abundance estimates were computed with Salmon (version 1.1.0)<sup>108</sup> with a decoy-aware  
674 transcriptome. After the import of transcript abundances, differential gene expression analysis was  
675 performed with the DESeq2<sup>109</sup> R package with the significance thresholds  $|\log_2\text{FoldChange}| > 1$  and  
676 adjusted p-value (padj)  $< 0.05$ . Differential splicing was detected with LeafCutter (version 0.2.8)<sup>110</sup> with  
677 the significance thresholds  $|\text{deltapsi}| > 0.1$  and adjusted p-value (p.adjust)  $< 0.05$ . Differential  
678 transcript usage was computed with IsoformSwitchAnalyzerR (version 1.6.0) and the DEXSeq  
679 method<sup>75,111-115</sup>. Significance thresholds were  $|\text{dIF}| > 0.1$  and adjusted p-value  
680 (isoform\_switch\_q\_value)  $< 0.05$ .

681 PTC status of transcript isoforms with annotated open reading frame was determined by  
682 IsoformSwitchAnalyzeR using the 50 nt rule of NMD<sup>75,116-118</sup>. Isoforms with no annotated open reading  
683 frame in GENCODE were designated “NA” in the PTC analysis.

684 The control, SMG7 and SMG6/7 knockdown datasets (Gene Expression Omnibus, GEO:  
685 GSE86148)<sup>14</sup> and UPF1 RIP-seq datasets (GEO: GSE69586)<sup>48</sup> were processed and analysed with the  
686 same programs, program versions, and scripts as the SMG7 KO dataset, with minor changes due to the  
687 different sequencing method (paired-end vs. single-end) or lower replicate numbers. For open reading  
688 frame prediction, QTI-seq data (NCBI Sequence Read Archive accession SRA160745)<sup>119</sup> were processed  
689 with the Ribo-TISH toolkit<sup>120</sup>. All major parameters for the RNA-Seq analysis are listed in  
690 **Supplementary Table 4**. Overlaps of data sets were represented via nVenn<sup>121</sup> or the ComplexHeatmap  
691 package<sup>122</sup>. Barcode plots were produced with the barcodeplot function from the limma package<sup>113</sup>  
692 using transcript isoform dIF as ranking statistic. Integrative Genomics Viewer (IGV)<sup>123</sup> snapshots were  
693 generated from mapped reads (BAM files) converted to binary tiled data (tdf), using Alfred<sup>124</sup> with  
694 resolution set to 1 and IGVtools. Mean junction counts were obtained from sashimi plots generated  
695 using ggsashimi<sup>125</sup>.

## 696 **Protein structure modelling and visualization**

697 The structure of human SMG7 (PDB: 1YA0) was superimposed onto the *C. elegans* SMG7 (PDB:  
698 3ZHE) using the MatchMaker command in Chimera version 1.13<sup>126</sup>, to generate a hsSMG7-ceSMG5  
699 hybrid model. ChimeraX version 1.0<sup>127</sup> was used to visualize the modelled structure.

## 700 **Northern blotting**

701 The cells were harvested in peqGOLD TriFast reagent (VWR) and total RNA extraction was  
702 performed as described above. 2-4 µg of total RNA were resolved on a 1% agarose/0.4 M formaldehyde  
703 gel using the tricine/triethanolamine buffer system<sup>128</sup> followed by a transfer on a nylon membrane  
704 (Roth) in 10x SSC. The blots were incubated overnight at 65°C in Church buffer containing α-32P-GTP  
705 [800 Ci/mmol, 10 mCi/ml] body-labelled RNA probes for detection of the reporter mRNA<sup>77</sup>.

706 Endogenous 7SL RNA was detected by a 5'-32P-labeled oligonucleotide (5'-  
707 TGCTCCGTTTCCGACCTGGGCCGGTTCACCCCTCCTT-3') for which  $\gamma$ -32P-ATP [800 Ci/mmol, 10 mCi/ml]  
708 was used for labelling. For NOP56 northern blots, the ex8b riboprobe sequence  
709 (5'-GAAACUUGGUCCCUUUGCUGGGCCUGGGAAUCACUCAGACACCAGGACUGGCCAUCACCCCAUAG  
710 CAGAGGCCUGUAUAGGUCAGGGAGCCUGGUCAGCCAUCACCGUGAUCCCCAACAAGCAGUGGGCACCA  
711 GAAGUGGCACCUGAUU -3')<sup>78</sup> was cloned into the pSP73 vector, linearized and in vitro transcribed  
712 using  $\alpha$ -32P-GTP [3000 Ci/mmol, 10 mCi/ml]. Ethidium bromide stained 28S and 18S rRNA served as  
713 loading controls. RNA signal detected with the Typhoon FLA 7000 (GE Healthcare) was quantified in a  
714 semi-automated manner using the ImageQuant TL 1D software with a rolling-ball background  
715 correction. EtBr-stained rRNA bands were quantified with the Image Lab 6.0.1 software (Bio-Rad).  
716 Signal intensities were normalized to the internal control (7SL or rRNA) before calculation of mean  
717 values. The control condition was set to unity (TPI WT for reporter assays), quantification results are  
718 shown as data points and mean.

### 719 **RNA immunoprecipitation (RIP)**

720 The RIP protocol was adapted from<sup>48</sup>. After seeding and reverse transfecting cells with siRNA, the  
721 expression of FLAG-tagged proteins was induced 24 h later. After another 48 h, the cells were  
722 washed with 2 ml PBS, harvested in 1 ml PBS, collected for 10 min at 100 xg and resuspended in 300  
723  $\mu$ l RIP lysis buffer (10 mM Tris pH 7.5, 150 mM NaCl, 2 mM EDTA, 0.1% Triton X-100) supplemented  
724 with 1 tablet of PhosSTOP (Roche), 100  $\mu$ l EDTA-free HALT Protease & Phosphatase Inhibitor  
725 (ThermoFisher) and 20  $\mu$ l RNasin (Promega) per 10 ml buffer. Protein concentration was measured,  
726 adjusted to 1 mg total protein in 333  $\mu$ l RIP buffer, 33  $\mu$ l of sample was added to 500  $\mu$ l peqGOLD  
727 TriFast and saved as input sample. The remaining sample was combined with 35  $\mu$ l pre-washed Anti-  
728 FLAG M2 Magnetic Beads (Sigma-Aldrich). The samples were incubated in an overhead rotator for 2  
729 h at 4 °C, washed 5x with 1 ml RIP Wash Buffer (5 mM Tris pH 7.5, 150 mM NaCl, 0.1% Triton X-100)  
730 and co-immunoprecipitated RNA was recovered by incubating the beads with 500  $\mu$ l peqGOLD  
731 TriFast for 10 min at room temperature.

732 Both input and IP samples were subjected to RNA extraction with the addition of 1  $\mu$ l  
733 Precipitation Carrier. 10  $\mu$ l of resuspended RNA was used for reverse transcription and 2 % of cDNA  
734 was used for quantitative PCR.

### 735 **Co-immunoprecipitation**

736 FLAG-tagged proteins were expressed in stable cell lines ( $2.5\text{-}3.0 \times 10^6$  cells per 10 cm dish) induced  
737 for 48-72 h. When indicated, the cells were subjected to an okadaic acid (OA) treatment for 2 h before  
738 harvesting with 50 or 100 nM OA. The samples were lysed in buffer E (20 mM HEPES-KOH (pH 7.9), 100  
739 mM KCl, 10% glycerol, 1 mM DTT, Protease Inhibitor, 1  $\mu$ g ml<sup>-1</sup> RNase A) and sonicated using the  
740 Bandelin Sonopuls mini20 with 15 pulses (2.5 mm tip in 600  $\mu$ l volume, 1s pulse, 50% amplitude).  
741 Concentration-adjusted lysates were subjected to immunoprecipitation for 2 h using Anti-FLAG M2  
742 Magnetic Beads (Sigma-Aldrich), the beads were washed three times for 5 min with buffer E, mild wash  
743 buffer (20 mM HEPES-KOH (pH 7.9), 137 mM NaCl, 2 mM MgCl<sub>2</sub>, 0.2% Triton X-100, 0.1% NP-40) or  
744 medium wash buffer (20 mM HEPES-KOH (pH 7.9), 200 mM NaCl, 2 mM MgCl<sub>2</sub>, 0.2% Triton X-100, 0.1%  
745 NP-40, 0.05% Na-deoxycholate). Co-immunoprecipitated proteins were eluted with SDS-sample  
746 buffer, separated by SDS-PAGE, and analysed by immunoblotting.

### 747 **Data Availability**

748 The accession number for the raw RNA-sequencing data reported in this paper is ArrayExpress: E-  
749 MTAB-9330. The authors declare that all the data supporting the findings of this study are available  
750 within the article and its Supplementary Information files and from the corresponding authors upon  
751 reasonable request.

### 752 **Code Availability**

753 For availability of codes that were developed for this project, please contact the corresponding  
754 authors.

755

## 756 **Acknowledgements**

757 We thank members of the Gehring lab for discussions and reading of the manuscript. We also  
758 thank Marek Franitza and Christian Becker (Cologne Center for Genomics, CCG) for preparing the  
759 sequencing libraries and operating the sequencer. We acknowledge Tobias Jakobi for helping with  
760 infrastructure support. This work was supported by grants from the Deutsche Forschungsgemeinschaft  
761 to C.D. (DI 1501/8-1, DI1501/8-2) and N.H.G. (GE 2014/6-2 and GE 2014/10-1). V.B. was funded under  
762 the Institutional Strategy of the University of Cologne within the German Excellence Initiative. N.H.G.  
763 acknowledges support by a Heisenberg professorship (GE 2014/7-1 and GE 2014/13-1) from the  
764 Deutsche Forschungsgemeinschaft. C.D. and T.B.B. were kindly supported by the Klaus Tschira Stiftung  
765 gGmbH (00.219.2013). This work was supported by the DFG Research Infrastructure as part of the Next  
766 Generation Sequencing Competence Network (project 423957469). NGS analyses were carried out at  
767 the production site WGGC Cologne.

## 768 **Author Contributions**

769 *Conceptualization*, N.H.G., S.K. and V.B.; *Methodology*, V.B., S.K., N.H.G.; *Software*, V.B., T.B.B.,  
770 J.V.G., and C.D.; *Investigation*, S.K., V.B. and J.V.G.; *Resources and Data Curation*, V.B., T.B.B., J.A.,  
771 and C.D.; *Writing – Original Draft, Review & Editing*, V.B., J.V.G., N.H.G. and S.K.; *Visualization*, V.B.  
772 and S.K.; *Supervision*, N.H.G. and V.B.; *Funding Acquisition*, N.H.G. and C.D.

## 773 **Competing interests**

774 The authors declare no competing interests.

775

## 776 References

- 777 1. Muhlemann, O. & Jensen, T.H. mRNP quality control goes regulatory. *Trends Genet* **28**, 70-7  
778 (2012).
- 779 2. Shoemaker, C.J. & Green, R. Translation drives mRNA quality control. *Nat Struct Mol Biol* **19**,  
780 594-601 (2012).
- 781 3. Schuller, A.P. & Green, R. Roadblocks and resolutions in eukaryotic translation. *Nat Rev Mol*  
782 *Cell Biol* **19**, 526-541 (2018).
- 783 4. Karousis, E.D. & Muhlemann, O. Nonsense-Mediated mRNA Decay Begins Where Translation  
784 Ends. *Cold Spring Harb Perspect Biol* **11**(2019).
- 785 5. Lloyd, J.P.B. The evolution and diversity of the nonsense-mediated mRNA decay pathway.  
786 *F1000Res* **7**, 1299 (2018).
- 787 6. Guan, Q. et al. Impact of nonsense-mediated mRNA decay on the global expression profile of  
788 budding yeast. *PLoS Genet* **2**, e203 (2006).
- 789 7. He, F. et al. Genome-wide analysis of mRNAs regulated by the nonsense-mediated and 5' to 3'  
790 mRNA decay pathways in yeast. *Mol Cell* **12**, 1439-52 (2003).
- 791 8. Lelivelt, M.J. & Culbertson, M.R. Yeast Upf proteins required for RNA surveillance affect global  
792 expression of the yeast transcriptome. *Mol Cell Biol* **19**, 6710-9 (1999).
- 793 9. Mendell, J.T., Sharifi, N.A., Meyers, J.L., Martinez-Murillo, F. & Dietz, H.C. Nonsense  
794 surveillance regulates expression of diverse classes of mammalian transcripts and mutes  
795 genomic noise. *Nat Genet* **36**, 1073-8 (2004).
- 796 10. Ramani, A.K. et al. High resolution transcriptome maps for wild-type and nonsense-mediated  
797 decay-defective *Caenorhabditis elegans*. *Genome Biol* **10**, R101 (2009).
- 798 11. Rehwinkel, J., Letunic, I., Raes, J., Bork, P. & Izaurralde, E. Nonsense-mediated mRNA decay  
799 factors act in concert to regulate common mRNA targets. *RNA* **11**, 1530-44 (2005).
- 800 12. Tani, H. et al. Identification of hundreds of novel UPF1 target transcripts by direct  
801 determination of whole transcriptome stability. *RNA Biol* **9**, 1370-9 (2012).
- 802 13. Wittmann, J., Hol, E.M. & Jack, H.M. hUPF2 silencing identifies physiologic substrates of  
803 mammalian nonsense-mediated mRNA decay. *Mol Cell Biol* **26**, 1272-87 (2006).
- 804 14. Colombo, M., Karousis, E.D., Bourquin, J., Bruggmann, R. & Muhlemann, O. Transcriptome-  
805 wide identification of NMD-targeted human mRNAs reveals extensive redundancy between  
806 SMG6- and SMG7-mediated degradation pathways. *RNA* **23**, 189-201 (2017).
- 807 15. Yepiskoposyan, H., Aeschmann, F., Nilsson, D., Okoniewski, M. & Muhlemann, O.  
808 Autoregulation of the nonsense-mediated mRNA decay pathway in human cells. *RNA* **17**, 2108-  
809 18 (2011).
- 810 16. Weischenfeldt, J. et al. NMD is essential for hematopoietic stem and progenitor cells and for  
811 eliminating by-products of programmed DNA rearrangements. *Genes Dev* **22**, 1381-96 (2008).

- 812 17. McIlwain, D.R. et al. Smg1 is required for embryogenesis and regulates diverse genes via  
813 alternative splicing coupled to nonsense-mediated mRNA decay. *Proc Natl Acad Sci U S A* **107**,  
814 12186-91 (2010).
- 815 18. Medghalchi, S.M. et al. Rent1, a trans-effector of nonsense-mediated mRNA decay, is essential  
816 for mammalian embryonic viability. *Hum Mol Genet* **10**, 99-105 (2001).
- 817 19. Li, T. et al. Smg6/Est1 licenses embryonic stem cell differentiation via nonsense-mediated  
818 mRNA decay. *EMBO J* **34**, 1630-47 (2015).
- 819 20. Wittkopp, N. et al. Nonsense-mediated mRNA decay effectors are essential for zebrafish  
820 embryonic development and survival. *Mol Cell Biol* **29**, 3517-28 (2009).
- 821 21. Hwang, J. & Maquat, L.E. Nonsense-mediated mRNA decay (NMD) in animal embryogenesis:  
822 to die or not to die, that is the question. *Curr Opin Genet Dev* **21**, 422-30 (2011).
- 823 22. Metzstein, M.M. & Krasnow, M.A. Functions of the nonsense-mediated mRNA decay pathway  
824 in Drosophila development. *PLoS Genet* **2**, e180 (2006).
- 825 23. Hoek, T.A. et al. Single-Molecule Imaging Uncovers Rules Governing Nonsense-Mediated  
826 mRNA Decay. *Mol Cell* **75**, 324-339 e11 (2019).
- 827 24. Buhler, M., Steiner, S., Mohn, F., Paillusson, A. & Muhlemann, O. EJC-independent degradation  
828 of nonsense immunoglobulin-mu mRNA depends on 3' UTR length. *Nat Struct Mol Biol* **13**, 462-  
829 4 (2006).
- 830 25. Eberle, A.B., Stalder, L., Mathys, H., Orozco, R.Z. & Muhlemann, O. Posttranscriptional gene  
831 regulation by spatial rearrangement of the 3' untranslated region. *PLoS Biol* **6**, e92 (2008).
- 832 26. Singh, G., Rebbapragada, I. & Lykke-Andersen, J. A competition between stimulators and  
833 antagonists of Upf complex recruitment governs human nonsense-mediated mRNA decay.  
834 *PLoS Biol* **6**, e111 (2008).
- 835 27. Kishor, A. et al. Activation and inhibition of nonsense-mediated mRNA decay control the  
836 abundance of alternative polyadenylation products. *Nucleic Acids Res* (2020).
- 837 28. Toma, K.G., Rebbapragada, I., Durand, S. & Lykke-Andersen, J. Identification of elements in  
838 human long 3' UTRs that inhibit nonsense-mediated decay. *RNA* **21**, 887-97 (2015).
- 839 29. Ge, Z., Quek, B.L., Beemon, K.L. & Hogg, J.R. Polypyrimidine tract binding protein 1 protects  
840 mRNAs from recognition by the nonsense-mediated mRNA decay pathway. *Elife* **5**(2016).
- 841 30. Kishor, A., Ge, Z. & Hogg, J.R. hnRNP L-dependent protection of normal mRNAs from NMD  
842 subverts quality control in B cell lymphoma. *EMBO J* **38**(2019).
- 843 31. Nagy, E. & Maquat, L.E. A rule for termination-codon position within intron-containing genes:  
844 when nonsense affects RNA abundance. *Trends Biochem Sci* **23**, 198-9 (1998).
- 845 32. Thermann, R. et al. Binary specification of nonsense codons by splicing and cytoplasmic  
846 translation. *EMBO J* **17**, 3484-94 (1998).
- 847 33. Zhang, J., Sun, X., Qian, Y., LaDuca, J.P. & Maquat, L.E. At least one intron is required for the  
848 nonsense-mediated decay of triosephosphate isomerase mRNA: a possible link between  
849 nuclear splicing and cytoplasmic translation. *Mol Cell Biol* **18**, 5272-83 (1998).



- 850 34. Zhang, J., Sun, X., Qian, Y. & Maquat, L.E. Intron function in the nonsense-mediated decay of  
851 beta-globin mRNA: indications that pre-mRNA splicing in the nucleus can influence mRNA  
852 translation in the cytoplasm. *RNA* **4**, 801-15 (1998).
- 853 35. Metze, S., Herzog, V.A., Ruepp, M.D. & Muhlemann, O. Comparison of EJC-enhanced and EJC-  
854 independent NMD in human cells reveals two partially redundant degradation pathways. *RNA*  
855 **19**, 1432-48 (2013).
- 856 36. Boehm, V., Haberman, N., Ottens, F., Ule, J. & Gehring, N.H. 3' UTR length and messenger  
857 ribonucleoprotein composition determine endocleavage efficiencies at termination codons.  
858 *Cell Rep* **9**, 555-68 (2014).
- 859 37. Gehring, N.H. et al. Exon-junction complex components specify distinct routes of nonsense-  
860 mediated mRNA decay with differential cofactor requirements. *Mol Cell* **20**, 65-75 (2005).
- 861 38. Le Hir, H., Gatfield, D., Izaurralde, E. & Moore, M.J. The exon-exon junction complex provides  
862 a binding platform for factors involved in mRNA export and nonsense-mediated mRNA decay.  
863 *EMBO J* **20**, 4987-97 (2001).
- 864 39. Le Hir, H., Izaurralde, E., Maquat, L.E. & Moore, M.J. The spliceosome deposits multiple  
865 proteins 20-24 nucleotides upstream of mRNA exon-exon junctions. *EMBO J* **19**, 6860-9 (2000).
- 866 40. Sauliere, J. et al. CLIP-seq of eIF4AIII reveals transcriptome-wide mapping of the human exon  
867 junction complex. *Nat Struct Mol Biol* **19**, 1124-31 (2012).
- 868 41. Singh, G. et al. The cellular EJC interactome reveals higher-order mRNP structure and an EJC-  
869 SR protein nexus. *Cell* **151**, 750-764 (2012).
- 870 42. Kishor, A., Fritz, S.E. & Hogg, J.R. Nonsense-mediated mRNA decay: The challenge of telling  
871 right from wrong in a complex transcriptome. *Wiley Interdiscip Rev RNA* **10**, e1548 (2019).
- 872 43. Lykke-Andersen, S. & Jensen, T.H. Nonsense-mediated mRNA decay: an intricate machinery  
873 that shapes transcriptomes. *Nat Rev Mol Cell Biol* **16**, 665-77 (2015).
- 874 44. Hogg, J.R. & Goff, S.P. Upf1 senses 3'UTR length to potentiate mRNA decay. *Cell* **143**, 379-89  
875 (2010).
- 876 45. Hurt, J.A., Robertson, A.D. & Burge, C.B. Global analyses of UPF1 binding and function reveal  
877 expanded scope of nonsense-mediated mRNA decay. *Genome Res* **23**, 1636-50 (2013).
- 878 46. Kurosaki, T. & Maquat, L.E. Rules that govern UPF1 binding to mRNA 3' UTRs. *Proc Natl Acad  
879 Sci U S A* **110**, 3357-62 (2013).
- 880 47. Zund, D., Gruber, A.R., Zavolan, M. & Muhlemann, O. Translation-dependent displacement of  
881 UPF1 from coding sequences causes its enrichment in 3' UTRs. *Nat Struct Mol Biol* **20**, 936-43  
882 (2013).
- 883 48. Lee, S.R., Pratt, G.A., Martinez, F.J., Yeo, G.W. & Lykke-Andersen, J. Target Discrimination in  
884 Nonsense-Mediated mRNA Decay Requires Upf1 ATPase Activity. *Mol Cell* **59**, 413-25 (2015).
- 885 49. Chamieh, H., Ballut, L., Bonneau, F. & Le Hir, H. NMD factors UPF2 and UPF3 bridge UPF1 to  
886 the exon junction complex and stimulate its RNA helicase activity. *Nat Struct Mol Biol* **15**, 85-  
887 93 (2008).



- 888 50. Kashima, I. et al. Binding of a novel SMG-1-Upf1-eRF1-eRF3 complex (SURF) to the exon  
889 junction complex triggers Upf1 phosphorylation and nonsense-mediated mRNA decay. *Genes*  
890 *Dev* **20**, 355-67 (2006).
- 891 51. Yamashita, A. Role of SMG-1-mediated Upf1 phosphorylation in mammalian nonsense-  
892 mediated mRNA decay. *Genes Cells* **18**, 161-75 (2013).
- 893 52. Yamashita, A., Ohnishi, T., Kashima, I., Taya, Y. & Ohno, S. Human SMG-1, a novel  
894 phosphatidylinositol 3-kinase-related protein kinase, associates with components of the  
895 mRNA surveillance complex and is involved in the regulation of nonsense-mediated mRNA  
896 decay. *Genes Dev* **15**, 2215-28 (2001).
- 897 53. Ohnishi, T. et al. Phosphorylation of hUPF1 induces formation of mRNA surveillance complexes  
898 containing hSMG-5 and hSMG-7. *Mol Cell* **12**, 1187-200 (2003).
- 899 54. Hug, N. & Caceres, J.F. The RNA helicase DHX34 activates NMD by promoting a transition from  
900 the surveillance to the decay-inducing complex. *Cell Rep* **8**, 1845-1856 (2014).
- 901 55. Arias-Palomo, E. et al. The nonsense-mediated mRNA decay SMG-1 kinase is regulated by  
902 large-scale conformational changes controlled by SMG-8. *Genes Dev* **25**, 153-64 (2011).
- 903 56. Fernandez, I.S. et al. Characterization of SMG-9, an essential component of the nonsense-  
904 mediated mRNA decay SMG1C complex. *Nucleic Acids Res* **39**, 347-58 (2011).
- 905 57. Melero, R. et al. Structures of SMG1-UPFs complexes: SMG1 contributes to regulate UPF2-  
906 dependent activation of UPF1 in NMD. *Structure* **22**, 1105-1119 (2014).
- 907 58. Yamashita, A. et al. SMG-8 and SMG-9, two novel subunits of the SMG-1 complex, regulate  
908 remodeling of the mRNA surveillance complex during nonsense-mediated mRNA decay. *Genes*  
909 *Dev* **23**, 1091-105 (2009).
- 910 59. Durand, S., Franks, T.M. & Lykke-Andersen, J. Hyperphosphorylation amplifies UPF1 activity to  
911 resolve stalls in nonsense-mediated mRNA decay. *Nat Commun* **7**, 12434 (2016).
- 912 60. Okada-Katsuhata, Y. et al. N- and C-terminal Upf1 phosphorylations create binding platforms  
913 for SMG-6 and SMG-5:SMG-7 during NMD. *Nucleic Acids Res* **40**, 1251-66 (2012).
- 914 61. Kurosaki, T. et al. A post-translational regulatory switch on UPF1 controls targeted mRNA  
915 degradation. *Genes Dev* **28**, 1900-16 (2014).
- 916 62. Jonas, S., Weichenrieder, O. & Izaurralde, E. An unusual arrangement of two 14-3-3-like  
917 domains in the SMG5-SMG7 heterodimer is required for efficient nonsense-mediated mRNA  
918 decay. *Genes Dev* **27**, 211-25 (2013).
- 919 63. Chakrabarti, S., Bonneau, F., Schussler, S., Eppinger, E. & Conti, E. Phospho-dependent and  
920 phospho-independent interactions of the helicase UPF1 with the NMD factors SMG5-SMG7  
921 and SMG6. *Nucleic Acids Res* **42**, 9447-60 (2014).
- 922 64. Loh, B., Jonas, S. & Izaurralde, E. The SMG5-SMG7 heterodimer directly recruits the CCR4-NOT  
923 deadenylase complex to mRNAs containing nonsense codons via interaction with POP2. *Genes*  
924 *Dev* **27**, 2125-38 (2013).

- 925 65. Nicholson, P., Gkratsou, A., Josi, C., Colombo, M. & Muhlemann, O. Dissecting the functions of  
926 SMG5, SMG7, and PNRC2 in nonsense-mediated mRNA decay of human cells. *RNA* **24**, 557-  
927 573 (2018).
- 928 66. Unterholzner, L. & Izaurralde, E. SMG7 acts as a molecular link between mRNA surveillance  
929 and mRNA decay. *Mol Cell* **16**, 587-96 (2004).
- 930 67. Huntzinger, E., Kashima, I., Fauser, M., Sauliere, J. & Izaurralde, E. SMG6 is the catalytic  
931 endonuclease that cleaves mRNAs containing nonsense codons in metazoan. *RNA* **14**, 2609-17  
932 (2008).
- 933 68. Eberle, A.B., Lykke-Andersen, S., Muhlemann, O. & Jensen, T.H. SMG6 promotes  
934 endonucleolytic cleavage of nonsense mRNA in human cells. *Nat Struct Mol Biol* **16**, 49-55  
935 (2009).
- 936 69. Gatfield, D. & Izaurralde, E. Nonsense-mediated messenger RNA decay is initiated by  
937 endonucleolytic cleavage in *Drosophila*. *Nature* **429**, 575-8 (2004).
- 938 70. Lykke-Andersen, S. et al. Human nonsense-mediated RNA decay initiates widely by  
939 endonucleolysis and targets snRNA host genes. *Genes Dev* **28**, 2498-517 (2014).
- 940 71. Schmidt, S.A. et al. Identification of SMG6 cleavage sites and a preferred RNA cleavage motif  
941 by global analysis of endogenous NMD targets in human cells. *Nucleic Acids Res* **43**, 309-23  
942 (2015).
- 943 72. Boehm, V., Gerbracht, J.V., Marx, M.C. & Gehring, N.H. Interrogating the degradation  
944 pathways of unstable mRNAs with XRN1-resistant sequences. *Nat Commun* **7**, 13691 (2016).
- 945 73. Luke, B. et al. *Saccharomyces cerevisiae* Ebs1p is a putative ortholog of human Smg7 and  
946 promotes nonsense-mediated mRNA decay. *Nucleic Acids Res* **35**, 7688-97 (2007).
- 947 74. Sureau, A., Gattoni, R., Dooghe, Y., Stevenin, J. & Soret, J. SC35 autoregulates its expression by  
948 promoting splicing events that destabilize its mRNAs. *EMBO J* **20**, 1785-96 (2001).
- 949 75. Vitting-Seerup, K. & Sandelin, A. The Landscape of Isoform Switches in Human Cancers. *Mol*  
950 *Cancer Res* **15**, 1206-1220 (2017).
- 951 76. Fukuhara, N. et al. SMG7 is a 14-3-3-like adaptor in the nonsense-mediated mRNA decay  
952 pathway. *Mol Cell* **17**, 537-47 (2005).
- 953 77. Voigt, F. et al. Detection and quantification of RNA decay intermediates using XRN1-resistant  
954 reporter transcripts. *Nat Protoc* **14**, 1603-1633 (2019).
- 955 78. Lykke-Andersen, S., Ardal, B.K., Hollensen, A.K., Damgaard, C.K. & Jensen, T.H. Box C/D snoRNP  
956 Autoregulation by a cis-Acting snoRNA in the NOP56 Pre-mRNA. *Mol Cell* **72**, 99-111 e5 (2018).
- 957 79. Nicholson, P., Josi, C., Kurosawa, H., Yamashita, A. & Muhlemann, O. A novel phosphorylation-  
958 independent interaction between SMG6 and UPF1 is essential for human NMD. *Nucleic Acids*  
959 *Res* **42**, 9217-35 (2014).
- 960 80. Anders, K.R., Grimson, A. & Anderson, P. SMG-5, required for *C.elegans* nonsense-mediated  
961 mRNA decay, associates with SMG-2 and protein phosphatase 2A. *EMBO J* **22**, 641-50 (2003).

- 962 81. Chiu, S.Y., Serin, G., Ohara, O. & Maquat, L.E. Characterization of human Smg5/7a: a protein  
963 with similarities to *Caenorhabditis elegans* SMG5 and SMG7 that functions in the  
964 dephosphorylation of Upf1. *RNA* **9**, 77-87 (2003).
- 965 82. Glavan, F., Behm-Ansmant, I., Izaurralde, E. & Conti, E. Structures of the PIN domains of SMG6  
966 and SMG5 reveal a nuclease within the mRNA surveillance complex. *EMBO J* **25**, 5117-25  
967 (2006).
- 968 83. Cho, H. et al. SMG5-PNRC2 is functionally dominant compared with SMG5-SMG7 in  
969 mammalian nonsense-mediated mRNA decay. *Nucleic Acids Res* **41**, 1319-28 (2013).
- 970 84. Lykke-Andersen, J. Identification of a human decapping complex associated with hUpf proteins  
971 in nonsense-mediated decay. *Mol Cell Biol* **22**, 8114-21 (2002).
- 972 85. Lejeune, F., Li, X. & Maquat, L.E. Nonsense-mediated mRNA decay in mammalian cells involves  
973 decapping, deadenylating, and exonucleolytic activities. *Mol Cell* **12**, 675-87 (2003).
- 974 86. Cho, H., Kim, K.M. & Kim, Y.K. Human proline-rich nuclear receptor coregulatory protein 2  
975 mediates an interaction between mRNA surveillance machinery and decapping complex. *Mol*  
976 *Cell* **33**, 75-86 (2009).
- 977 87. Lai, T. et al. Structural basis of the PNRC2-mediated link between mRNA surveillance and  
978 decapping. *Structure* **20**, 2025-37 (2012).
- 979 88. Beck, M. et al. The quantitative proteome of a human cell line. *Mol Syst Biol* **7**, 549 (2011).
- 980 89. Geiger, T., Wehner, A., Schaab, C., Cox, J. & Mann, M. Comparative proteomic analysis of  
981 eleven common cell lines reveals ubiquitous but varying expression of most proteins. *Mol Cell*  
982 *Proteomics* **11**, M111 014050 (2012).
- 983 90. Ottens, F., Boehm, V., Sibley, C.R., Ule, J. & Gehring, N.H. Transcript-specific characteristics  
984 determine the contribution of endo- and exonucleolytic decay pathways during the  
985 degradation of nonsense-mediated decay substrates. *RNA* **23**, 1224-1236 (2017).
- 986 91. Lindeboom, R.G., Supek, F. & Lehner, B. The rules and impact of nonsense-mediated mRNA  
987 decay in human cancers. *Nat Genet* **48**, 1112-8 (2016).
- 988 92. Hilleren, P. & Parker, R. mRNA surveillance in eukaryotes: kinetic proofreading of proper  
989 translation termination as assessed by mRNP domain organization? *RNA* **5**, 711-9 (1999).
- 990 93. Amrani, N. et al. A faux 3'-UTR promotes aberrant termination and triggers nonsense-  
991 mediated mRNA decay. *Nature* **432**, 112-8 (2004).
- 992 94. Behm-Ansmant, I., Gatfield, D., Rehwinkel, J., Hilgers, V. & Izaurralde, E. A conserved role for  
993 cytoplasmic poly(A)-binding protein 1 (PABPC1) in nonsense-mediated mRNA decay. *EMBO J*  
994 **26**, 1591-601 (2007).
- 995 95. Ivanov, P.V., Gehring, N.H., Kunz, J.B., Hentze, M.W. & Kulozik, A.E. Interactions between UPF1,  
996 eRFs, PABP and the exon junction complex suggest an integrated model for mammalian NMD  
997 pathways. *EMBO J* **27**, 736-47 (2008).
- 998 96. Fritz, S.E., Ranganathan, S., Wang, C.D. & Hogg, J.R. The RNA-binding protein PTBP1 promotes  
999 ATPase-dependent dissociation of the RNA helicase UPF1 to protect transcripts from  
1000 nonsense-mediated mRNA decay. *J Biol Chem* (2020).

- 1001 97. Clerici, M. et al. Structural and functional analysis of the three MIF4G domains of nonsense-  
1002 mediated decay factor UPF2. *Nucleic Acids Res* **42**, 2673-86 (2014).
- 1003 98. Chakrabarti, S. et al. Molecular mechanisms for the RNA-dependent ATPase activity of Upf1  
1004 and its regulation by Upf2. *Mol Cell* **41**, 693-703 (2011).
- 1005 99. Deniaud, A. et al. A network of SMG-8, SMG-9 and SMG-1 C-terminal insertion domain  
1006 regulates UPF1 substrate recruitment and phosphorylation. *Nucleic Acids Res* **43**, 7600-11  
1007 (2015).
- 1008 100. Kashima, I. et al. SMG6 interacts with the exon junction complex via two conserved EJC-binding  
1009 motifs (EBMs) required for nonsense-mediated mRNA decay. *Genes Dev* **24**, 2440-50 (2010).
- 1010 101. Fiorini, F., Boudvillain, M. & Le Hir, H. Tight intramolecular regulation of the human Upf1  
1011 helicase by its N- and C-terminal domains. *Nucleic Acids Res* **41**, 2404-15 (2013).
- 1012 102. Franks, T.M., Singh, G. & Lykke-Andersen, J. Upf1 ATPase-dependent mRNP disassembly is  
1013 required for completion of nonsense-mediated mRNA decay. *Cell* **143**, 938-50 (2010).
- 1014 103. Page, M.F., Carr, B., Anders, K.R., Grimson, A. & Anderson, P. SMG-2 is a phosphorylated  
1015 protein required for mRNA surveillance in *Caenorhabditis elegans* and related to Upf1p of  
1016 yeast. *Mol Cell Biol* **19**, 5943-51 (1999).
- 1017 104. Nelson, J.O., Forster, D., Frizzell, K.A., Luschnig, S. & Metzstein, M.M. Multiple Nonsense-  
1018 Mediated mRNA Processes Require Smg5 in *Drosophila*. *Genetics* **209**, 1073-1084 (2018).
- 1019 105. Gatfield, D., Unterholzner, L., Ciccarelli, F.D., Bork, P. & Izaurralde, E. Nonsense-mediated  
1020 mRNA decay in *Drosophila*: at the intersection of the yeast and mammalian pathways. *EMBO*  
1021 *J* **22**, 3960-70 (2003).
- 1022 106. Young, L., Sung, J., Stacey, G. & Masters, J.R. Detection of *Mycoplasma* in cell cultures. *Nat*  
1023 *Protoc* **5**, 929-34 (2010).
- 1024 107. Dobin, A. et al. STAR: ultrafast universal RNA-seq aligner. *Bioinformatics* **29**, 15-21 (2013).
- 1025 108. Patro, R., Duggal, G., Love, M.I., Irizarry, R.A. & Kingsford, C. Salmon provides fast and bias-  
1026 aware quantification of transcript expression. *Nat Methods* **14**, 417-419 (2017).
- 1027 109. Love, M.I., Huber, W. & Anders, S. Moderated estimation of fold change and dispersion for  
1028 RNA-seq data with DESeq2. *Genome Biol* **15**, 550 (2014).
- 1029 110. Li, Y.I. et al. Annotation-free quantification of RNA splicing using LeafCutter. *Nat Genet* **50**, 151-  
1030 158 (2018).
- 1031 111. Anders, S., Reyes, A. & Huber, W. Detecting differential usage of exons from RNA-seq data.  
1032 *Genome Res* **22**, 2008-17 (2012).
- 1033 112. Vitting-Seerup, K. & Sandelin, A. IsoformSwitchAnalyzeR: analysis of changes in genome-wide  
1034 patterns of alternative splicing and its functional consequences. *Bioinformatics* **35**, 4469-4471  
1035 (2019).
- 1036 113. Ritchie, M.E. et al. limma powers differential expression analyses for RNA-sequencing and  
1037 microarray studies. *Nucleic Acids Res* **43**, e47 (2015).

- 1038 114. Sonesson, C., Love, M.I. & Robinson, M.D. Differential analyses for RNA-seq: transcript-level  
1039 estimates improve gene-level inferences. *F1000Res* **4**, 1521 (2015).
- 1040 115. Robinson, M.D. & Oshlack, A. A scaling normalization method for differential expression  
1041 analysis of RNA-seq data. *Genome Biol* **11**, R25 (2010).
- 1042 116. Vitting-Seerup, K., Porse, B.T., Sandelin, A. & Waage, J. spliceR: an R package for classification  
1043 of alternative splicing and prediction of coding potential from RNA-seq data. *BMC*  
1044 *Bioinformatics* **15**, 81 (2014).
- 1045 117. Huber, W. et al. Orchestrating high-throughput genomic analysis with Bioconductor. *Nat*  
1046 *Methods* **12**, 115-21 (2015).
- 1047 118. Weischenfeldt, J. et al. Mammalian tissues defective in nonsense-mediated mRNA decay  
1048 display highly aberrant splicing patterns. *Genome Biol* **13**, R35 (2012).
- 1049 119. Gao, X. et al. Quantitative profiling of initiating ribosomes in vivo. *Nat Methods* **12**, 147-53  
1050 (2015).
- 1051 120. Zhang, P. et al. Genome-wide identification and differential analysis of translational initiation.  
1052 *Nat Commun* **8**, 1749 (2017).
- 1053 121. Perez-Silva, J.G., Araujo-Voces, M. & Quesada, V. nVenn: generalized, quasi-proportional Venn  
1054 and Euler diagrams. *Bioinformatics* **34**, 2322-2324 (2018).
- 1055 122. Gu, Z., Eils, R. & Schlesner, M. Complex heatmaps reveal patterns and correlations in  
1056 multidimensional genomic data. *Bioinformatics* **32**, 2847-9 (2016).
- 1057 123. Robinson, J.T. et al. Integrative genomics viewer. *Nat Biotechnol* **29**, 24-6 (2011).
- 1058 124. Rausch, T., Hsi-Yang Fritz, M., Korbelt, J.O. & Benes, V. Alfred: interactive multi-sample BAM  
1059 alignment statistics, feature counting and feature annotation for long- and short-read  
1060 sequencing. *Bioinformatics* **35**, 2489-2491 (2019).
- 1061 125. Garrido-Martin, D., Palumbo, E., Guigo, R. & Breschi, A. ggsashimi: Sashimi plot revised for  
1062 browser- and annotation-independent splicing visualization. *PLoS Comput Biol* **14**, e1006360  
1063 (2018).
- 1064 126. Pettersen, E.F. et al. UCSF Chimera--a visualization system for exploratory research and  
1065 analysis. *J Comput Chem* **25**, 1605-12 (2004).
- 1066 127. Goddard, T.D. et al. UCSF ChimeraX: Meeting modern challenges in visualization and analysis.  
1067 *Protein Sci* **27**, 14-25 (2018).
- 1068 128. Mansour, F.H. & Pestov, D.G. Separation of long RNA by agarose-formaldehyde gel  
1069 electrophoresis. *Anal Biochem* **441**, 18-20 (2013).

1070

## 1071 **Figure Legends**

### 1072 **Fig. 1: SMG7 depletion impairs NMD activity.**

1073 **a**, Schematic representation of the final steps of NMD. Phosphorylated UPF1 (indicated by the  
1074 red sphere) recruits the SMG5-SMG7 heterodimer to the target mRNA, thereby promoting  
1075 deadenylation. Recruitment of SMG6 to UPF1 results in endonucleolytic cleavage of the target  
1076 transcript via the SMG6 PIN domain. The SMG5 PIN domain is inactive.

1077 **b**, Western blot analysis of SMG7 knockout (KO) cell lines (clones 2, 31 and 34) with the anti-  
1078 SMG7 antibodies AK-133, AK-134 and AK-136; Tubulin serves as control (see Methods for antibody  
1079 details). The region of SMG7 detected by the antibodies is schematically depicted and the crRNA  
1080 targeting site indicated.

1081 **c**, End-point RT-PCR detection of SRSF2 transcript isoforms (top) and quantitative RT-PCR-based  
1082 detection (qPCR; bottom) of ZFAS1 in the indicated cell lines with or without expression of FLAG-  
1083 tagged SMG7 as rescue construct. The detected SRSF2 isoforms are indicated on the right, the NMD-  
1084 inducing included exon is marked in red (e = exon). Relative mRNA levels of SRSF2 isoforms were  
1085 quantified from bands of agarose gels; data points and means from the qPCRs are plotted as log<sub>2</sub>  
1086 fold change (log<sub>2</sub>FC) (n=3).

1087 **d**, Quantitative RT-PCR-based detection (qPCR) of SRSF2 isoforms and ZFAS1 in the indicated cell  
1088 lines upon treatment with the indicated siRNA. The ratio of NMD isoform to canonical isoform  
1089 (SRSF2) and ZFAS1 to the C1orf43 reference was calculated; data points and means from the qPCRs  
1090 are plotted as log<sub>2</sub> fold change (log<sub>2</sub>FC) (n=3).

1091 **e**, Read coverage of SRSF2 from SMG7 KO and published SMG7 KD (Colombo et al. 2017) RNA-  
1092 Seq data is shown as Integrative Genomics Viewer (IGV) snapshots. The canonical and NMD-sensitive  
1093 isoforms are schematically indicated below. Percent spliced in (PSI; from leafcutter analysis) and  
1094 mean counts from 4 indicative splice junctions are shown. Differential gene expression (from  
1095 DESeq2) is depicted as log<sub>2</sub> fold change (log<sub>2</sub>FC) as last column.



1096 **f**, Overlap of up- or downregulated premature termination codon (PTC)-containing isoforms  
1097 between the SMG7 KO or KD RNA-Seq data is shown as UpSet plot.

1098 **g-i**, Volcano plots show different SMG7 depletion RNA-Seq analyses. Isoforms containing  
1099 annotated PTC (red, TRUE), regular stop codons (blue, FALSE) or having no annotated open reading  
1100 frame (gray, NA) are indicated. The change in isoform fraction (dIF) is plotted against the  $-\log_{10}$   
1101 adjusted p-value (adj.p-value). Density plots show the distribution of filtered PTC positive/negative  
1102 isoforms in respect to the dIF, cutoffs were  $|dIF| > 0.1$  and  $adj.p\text{-value} < 0.05$ .

1103 **Fig. 2: SMG7 requires the interaction with SMG5 to rescue the SMG7 knockout**  
1104 **phenotype.**

1105 **a**, Schematic representation of the SMG7 domain structure. The proposed functions of the  
1106 domains are indicated and mutated constructs and their expected effect are shown below.

1107 **b**, Quantitative RT-PCR-based detection (qPCR) of SRSF2 isoforms and ZFAS1 was carried out in  
1108 the indicated cell lines upon expression of the indicated FLAG-tagged rescue constructs. The ratio of  
1109 NMD isoform to canonical isoform (SRSF2) and ZFAS1 to the C1orf43 reference was calculated; data  
1110 points and means from the qPCRs are plotted as  $\log_2$  fold change ( $\log_2FC$ ) ( $n=3$ ). Western blot  
1111 analyses are shown below. Tubulin serves as control.

1112 **c**, Model of the SMG5-SMG7 heterodimer structure. Human SMG7 (PDB ID: 1YA0) was modelled  
1113 on the *C. elegans* SMG5-SMG7 structure (PDB ID: 3ZHE). Critical SMG7 mutations are highlighted in  
1114 red and the highlighted sulphate ion mimics a phosphorylated residue.

1115 **d**, Quantitative RT-PCR-based detection (qPCR) of SRSF2 isoforms and ZFAS1 was carried out in  
1116 the indicated cell lines upon treatment with the indicated siRNA. The ratio of NMD isoform to  
1117 canonical isoform (SRSF2) and ZFAS1 to the C1orf43 reference was calculated; data points and means  
1118 from the qPCRs are plotted as  $\log_2$  fold change ( $\log_2FC$ ) ( $n=3$ ).

1119

1120 **Fig. 3: Downregulation of SMG5 in SMG7 knockout cells completely inactivates NMD.**

1121 **a-f**, Volcano plots show the indicated RNA-Seq analyses. Isoforms containing annotated PTC (red,  
1122 TRUE), regular stop codons (blue, FALSE) or having not annotated open reading frame (grey, NA) are  
1123 indicated. The change in isoform fraction (dIF) is plotted against the  $-\log_{10}$  adjusted p-value (adj.p-  
1124 value). Density plots show the distribution of filtered PTC positive/negative isoforms in respect to the  
1125 dIF, cutoffs were  $|dIF| > 0.1$  and  $adj.p\text{-value} < 0.05$ .

1126 **g**, Read coverage of SRSF2 from SMG7 KO plus knockdown and published knockdown (Colombo  
1127 et al. 2017) RNA-Seq data is shown as Integrative Genomics Viewer (IGV) snapshots. The canonical  
1128 and NMD-sensitive isoforms are schematically indicated below. Percent spliced in (PSI; from  
1129 leafcutter analysis) and mean counts from 4 indicative splice junctions are shown. Differential gene  
1130 expression (from DESeq2) is depicted as  $\log_2$  fold change ( $\log_2FC$ ) as last column.

1131 **h**, Fraction of expressed genes (genes with non-zero counts in DESeq2) which undergo  
1132 differential gene expression (DGE), differential transcript usage (DTU) and/or alternative splicing (AS)  
1133 was calculated using the respective computational analysis.

1134 **Fig. 4: SMG6 endonucleolytic cleavage is inactivated in SMG5-SMG7 depleted cells.**

1135 **a**, Schematic overview of the triosephosphate isomerase (TPI) reporter constructs and their  
1136 functional elements.

1137 **b**, Northern blot analysis of TPI reporter, 3' fragments, xrFrag and 7SL endogenous control.  
1138 Ethidium bromide stained 28S and 18S rRNAs are shown as additional controls. Quantification results  
1139 are shown as data points and mean ( $n=3$ ).

1140 **c**, Northern blot analysis of endogenous NOP56. Different transcript isoforms are indicated.

1141 **d**, Schematic overview of UPF1, highlighting the putative SQ/TQ phosphorylation sites.

1142 **e-f**, Analysis of UPF1 phosphorylation status after IP of expressed FLAG-tagged UPF1 (**f**) with  
1143 quantification (**g**). Quantification results are shown as data points and mean ( $n=3$ ).



1144 **g-j**, qPCR detection of ZFAS1 (**h**), GAS5 (**i**), RPLP0 (**j**) and EEF1A1 (**k**) was carried out in IP and  
1145 Input samples after RNA immunoprecipitation (RIP) with FLAG-tagged UPF1. Data points and means  
1146 from the qPCRs are plotted as log<sub>2</sub> fold change (log<sub>2</sub>FC) (n=3). Raw Ct values are shown for  
1147 comparison.

1148 **Fig. 5: SMG7 supports NMD independently of the deadenylation-promoting function.**

1149 **a**, Schematic representation of the SMG7 domain structure. The proposed functions of the  
1150 domains are indicated and mutated constructs and their expected effect are shown below.

1151 **b**, Quantitative RT-PCR-based detection (qPCR) of SRSF2 isoforms and ZFAS1 was carried out in  
1152 the indicated cell lines upon expression of the indicated FLAG-tagged rescue constructs and  
1153 knockdown with the indicated siRNA. The ratio of NMD isoform to canonical isoform was calculated;  
1154 data points and means from the qPCRs are plotted as log<sub>2</sub> fold change (log<sub>2</sub>FC) (n=3). Western blot  
1155 analyses are shown below. Tubulin serves as control.

1156 **c**, Western blot after co-immunoprecipitation of FLAG-tagged GST (control) or SMG7 constructs.  
1157 Tubulin serves as control.

1158 **Fig. 6: SMG5 expression rescues the SMG7 KO phenotype.**

1159 **a**, Schematic representation of the SMG5 domain structure. The proposed functions of the  
1160 domains are indicated and mutated constructs and their expected effect are shown below.

1161 **b**, Quantitative RT-PCR-based detection (qPCR) of SRSF2 isoforms and ZFAS1 was carried out in  
1162 the indicated cell lines upon expression of the indicated FLAG-tagged rescue constructs and  
1163 knockdown with the indicated siRNA. The ratio of NMD isoform to canonical isoform was calculated;  
1164 data points and means from the qPCRs are plotted as log<sub>2</sub> fold change (log<sub>2</sub>FC) (n=3). Western blot  
1165 analyses are shown below. Tubulin serves as control.

1166 **c**, Northern blot analysis of endogenous NOP56 (n=3). Different transcript isoforms are indicated.

1167 **Fig. 7: Two-factor authentication model of NMD.**

1168 **a-d**, Regular inspection cycle of UPF1. UPF1 binds mRNA unspecifically and remains attached  
1169 until being displaced by the ribosome. UPF1 helicase and ATPase activity is stimulated when  
1170 ribosomes terminate translation efficiently. Subsequently, UPF1 dissociates from the mRNA and can  
1171 engage in a new cycle of inspection.

1172 **e-g**, First NMD authentication step. Upon aberrant translation termination (e.g. EJC downstream  
1173 of terminating ribosome), UPF1 remains bound on the mRNA. If an NMD activating features exist,  
1174 UPF1 is progressively phosphorylated by the kinase SMG1. Continued presence of UPF1 on the mRNA  
1175 and NMD-activating features lead to hyper-phosphorylated UPF1.

1176 **h-k**, Second NMD authentication step. If SMG5-SMG7 are absent, the hyper-phosphorylated  
1177 UPF1 accumulates and NMD cannot successfully eliminate the target transcript. Also, UPF1 is not  
1178 recycled. If SMG5-SMG7 are present, the interaction with UPF1 allows the binding of SMG6 to UPF1  
1179 in order to catalyse the endonucleolytic cleavage of the target transcript. The target transcript is fully  
1180 degraded by exonucleolytic activities. SMG5 may subsequently dephosphorylated UPF1, the helicase  
1181 activity is stimulated and UPF1 is effectively recycled for another round of inspection.

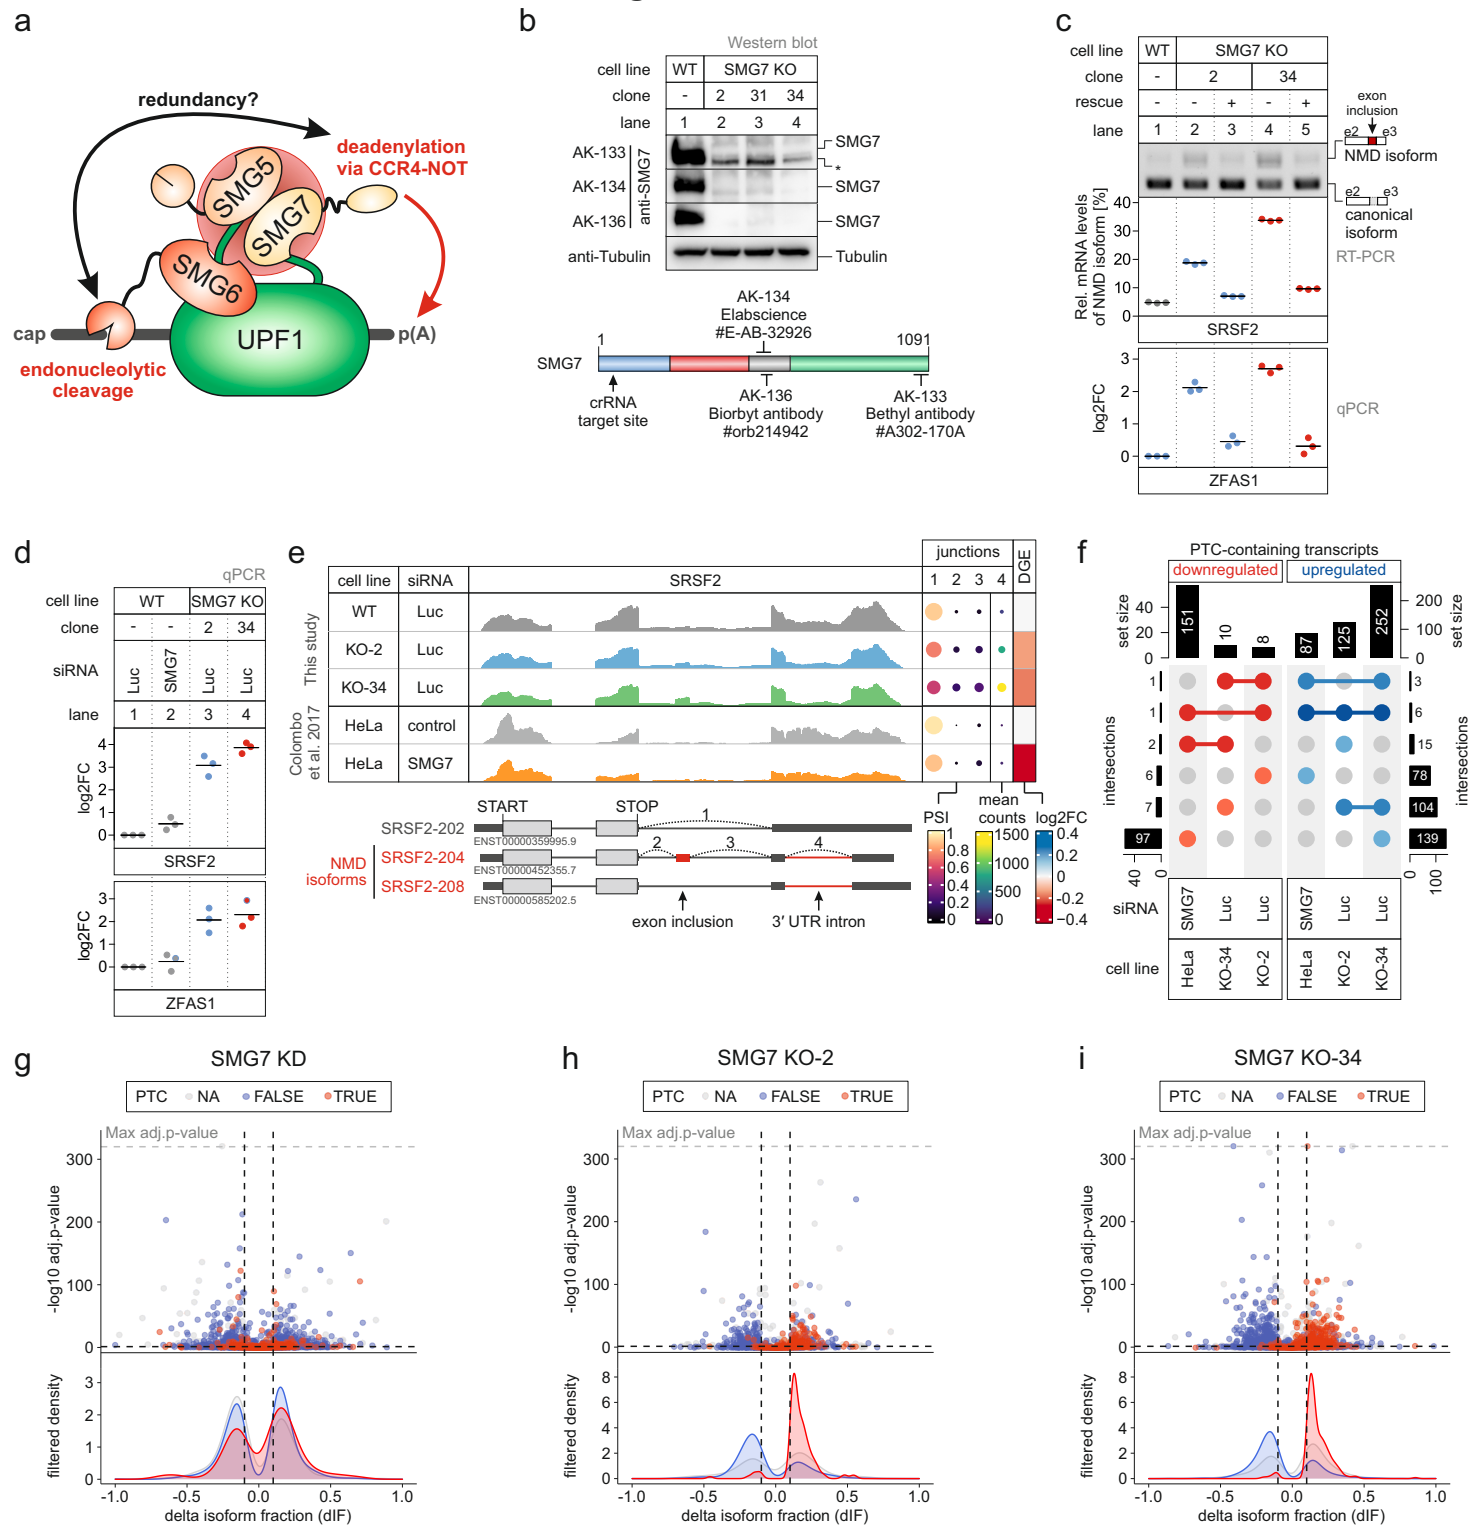

**Fig. 1: SMG7 depletion impairs NMD activity.**

**a**, Schematic representation of the final steps of NMD. Phosphorylated UPF1 (indicated by the red sphere) recruits the SMG5-SMG7 heterodimer to the target mRNA, thereby promoting deadenylation. Recruitment of SMG6 to UPF1 results in endonucleolytic cleavage of the target transcript via the SMG6 PIN domain. The SMG5 PIN domain is inactive.

**b**, Western blot analysis of SMG7 knockout (KO) cell lines (clones 2, 31 and 34) with the anti-SMG7 antibodies AK-133, AK-134 and AK-136; Tubulin serves as control (see Methods for antibody details). The region of SMG7 detected by the antibodies is schematically depicted and the crRNA targeting site indicated.

**c**, End-point RT-PCR detection of SRSF2 transcript isoforms (top) and quantitative RT-PCR-based detection (qPCR; bottom) of ZFAS1 in the indicated cell lines with or without expression of FLAG-tagged SMG7 as rescue construct. The detected SRSF2 isoforms are indicated on the right, the NMD-inducing included exon is marked in red (e = exon). Relative mRNA levels of SRSF2 isoforms were quantified from bands of agarose gels; data points and means from the qPCRs are plotted as log2 fold change (log2FC) (n=3).

**d**, Quantitative RT-PCR-based detection (qPCR) of SRSF2 isoforms and ZFAS1 in the indicated cell lines upon treatment with the indicated siRNA. The ratio of NMD isoform to canonical isoform (SRSF2) and ZFAS1 to the C1orf43 reference was calculated; data points and means from the qPCRs are plotted as log2 fold change (log2FC) (n=3).

**e**, Read coverage of SRSF2 from SMG7 KO and published SMG7 KD (Colombo et al., 2017) RNA-seq data is shown as Integrative Genomics Viewer (IGV) snapshots. The canonical and NMD-sensitive isoforms are schematically indicated below. Percent spliced in (PSI; from leafcutter analysis) and mean counts from 4 indicative splice junctions are shown. Differential gene expression (from DESeq2) is depicted as log2 fold change (log2FC) as last column.

**f**, Overlap of up- or downregulated premature termination codon (PTC)-containing isoforms between the SMG7 KO or KD RNA-seq data is shown as UpSet plot.

**g-i**, Volcano plots show different SMG7 depletion RNA-seq analyses. Isoforms containing annotated PTC (red, TRUE), regular stop codons (blue, FALSE) or having no annotated open reading frame (gray, NA) are indicated. The change in isoform fraction (dIF) is plotted against the -log10 adjusted p-value (adj.p-value). Density plots show the distribution of filtered PTC positive/negative isoforms in respect to the dIF, cutoffs were |dIF| > 0.1 and adj.p-value < 0.05. Density plots show the distribution of filtered PTC positive/negative isoforms in respect to the dIF, cutoffs were |dIF| > 0.1 and adj.p-value < 0.05.

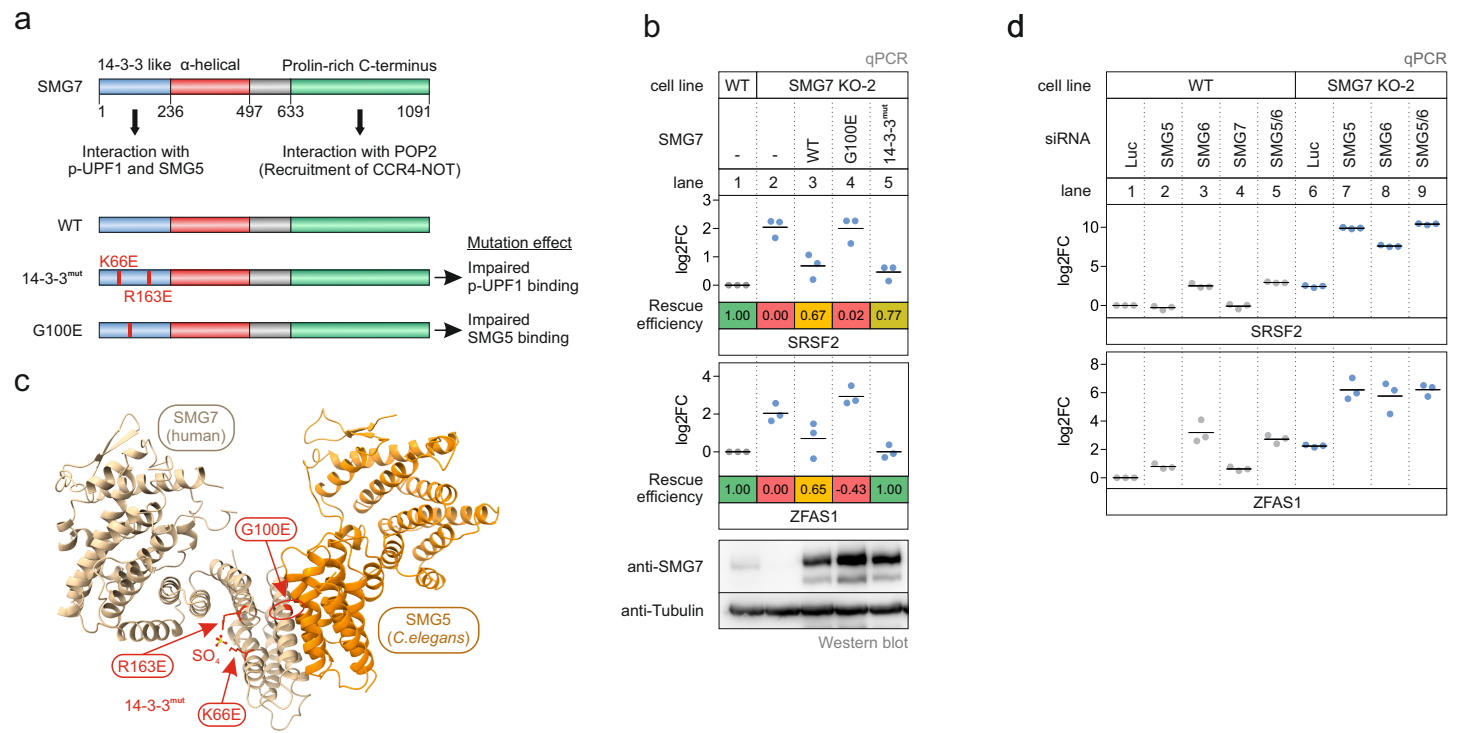

**Fig. 2: SMG7 requires the interaction with SMG5 to rescue the SMG7 knockout phenotype.**

- a**, Schematic representation of the SMG7 domain structure. The proposed functions of the domains are indicated and mutated constructs and their expected effect are shown below.
- b**, Quantitative RT-PCR-based detection (qPCR) of SRSF2 isoforms and ZFAS1 was carried out in the indicated cell lines upon expression of the indicated FLAG-tagged rescue constructs. The ratio of NMD isoform to canonical isoform (SRSF2) and ZFAS1 to the C1orf43 reference was calculated; data points and means from the qPCRs are plotted as log<sub>2</sub> fold change (log<sub>2</sub>FC) (n=3). Western blot analyses are shown below. Tubulin serves as control.
- c**, Model of the SMG5-SMG7 heterodimer structure. Human SMG7 (PDB ID: 1YA0) was modeled on the *C.elegans* SMG5-SMG7 structure (PDB ID: 3ZHE). Critical SMG7 mutations are highlighted in red and the highlighted sulfate ion mimics a phosphorylated residue.
- d**, Quantitative RT-PCR-based detection (qPCR) of SRSF2 isoforms and ZFAS1 was carried out in the indicated cell lines upon treatment with the indicated siRNA. The ratio of NMD isoform to canonical isoform (SRSF2) and ZFAS1 to the C1orf43 reference was calculated; data points and means from the qPCRs are plotted as log<sub>2</sub> fold change (log<sub>2</sub>FC) (n=3).

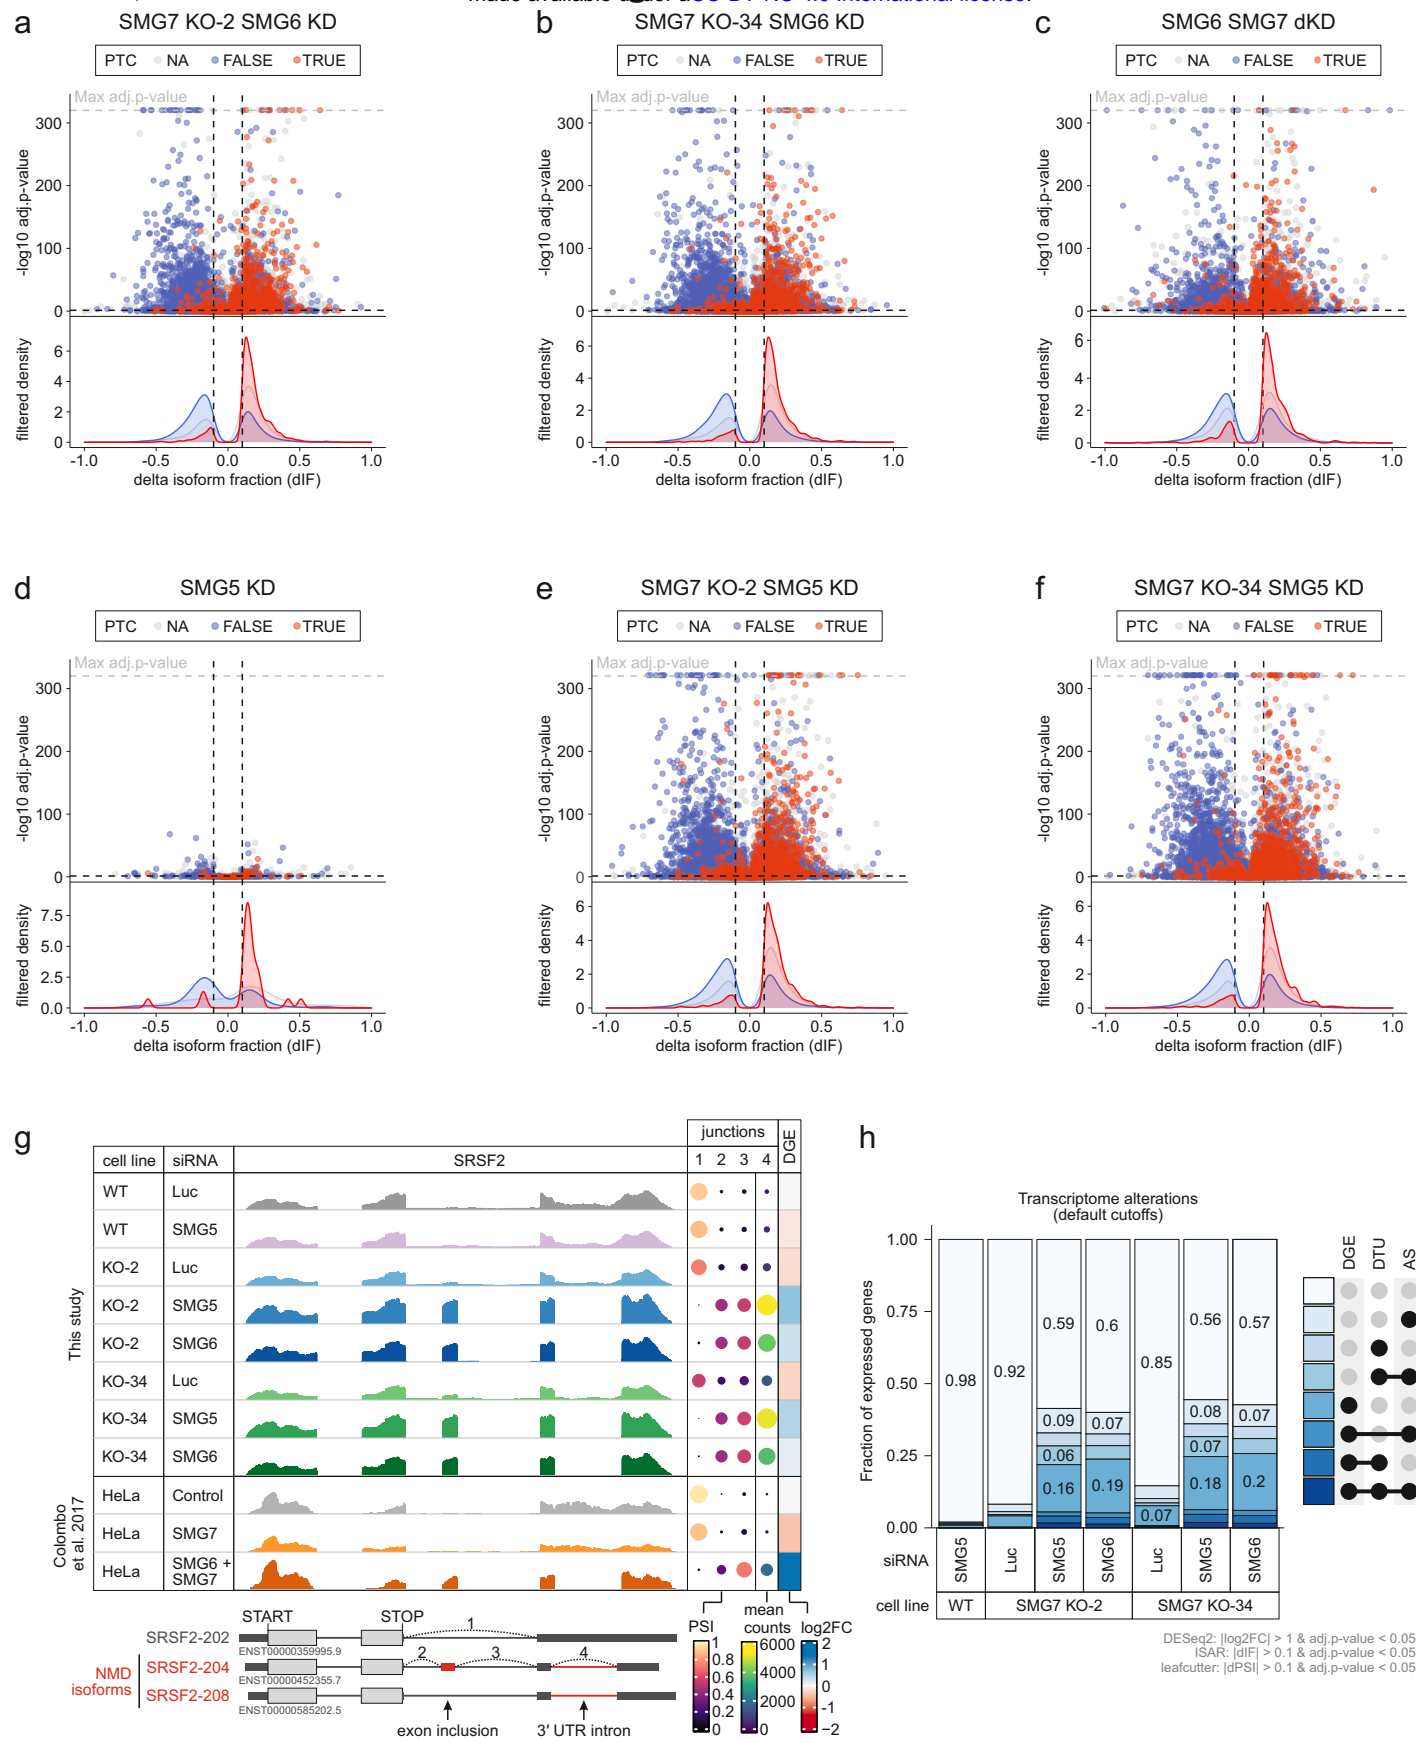

**Fig. 3: Downregulation of SMG5 in SMG7 knockout cells completely inactivates NMD.**

**a-f.** Volcano plots show the indicated RNA-seq analyses. Isoforms containing annotated premature termination codons (PTC; red, TRUE), regular stop codons (blue, FALSE) or having not annotated open reading frame (gray, NA) are indicated. The change in isoform fraction (dIF) is plotted against the -log<sub>10</sub> adjusted p-value (adj.p-value). Density plots show the distribution of filtered PTC positive/negative isoforms in respect to the dIF, cutoffs were |dIF| > 0.1 and adj.p-value < 0.05.

**g.** Read coverage of SRSF2 from SMG7 KO plus knockdown and published knockdown (Colombo et al. 2017) RNA-seq data is shown as Integrative Genomics Viewer (IGV) snapshots. The canonical and NMD-sensitive isoforms are schematically indicated below. Percent spliced in (PSI; from leafcutter analysis) and mean counts from 4 indicative splice junctions are shown. Differential gene expression (from DESeq2) is depicted as log<sub>2</sub> fold change (log<sub>2</sub>FC) as last column.

**h.** Fraction of expressed genes (genes with non-zero counts in DESeq2) which undergo differential gene expression (DGE), differential transcript usage (DTU) and/or alternative splicing (AS) was calculated using the respective computational analysis.

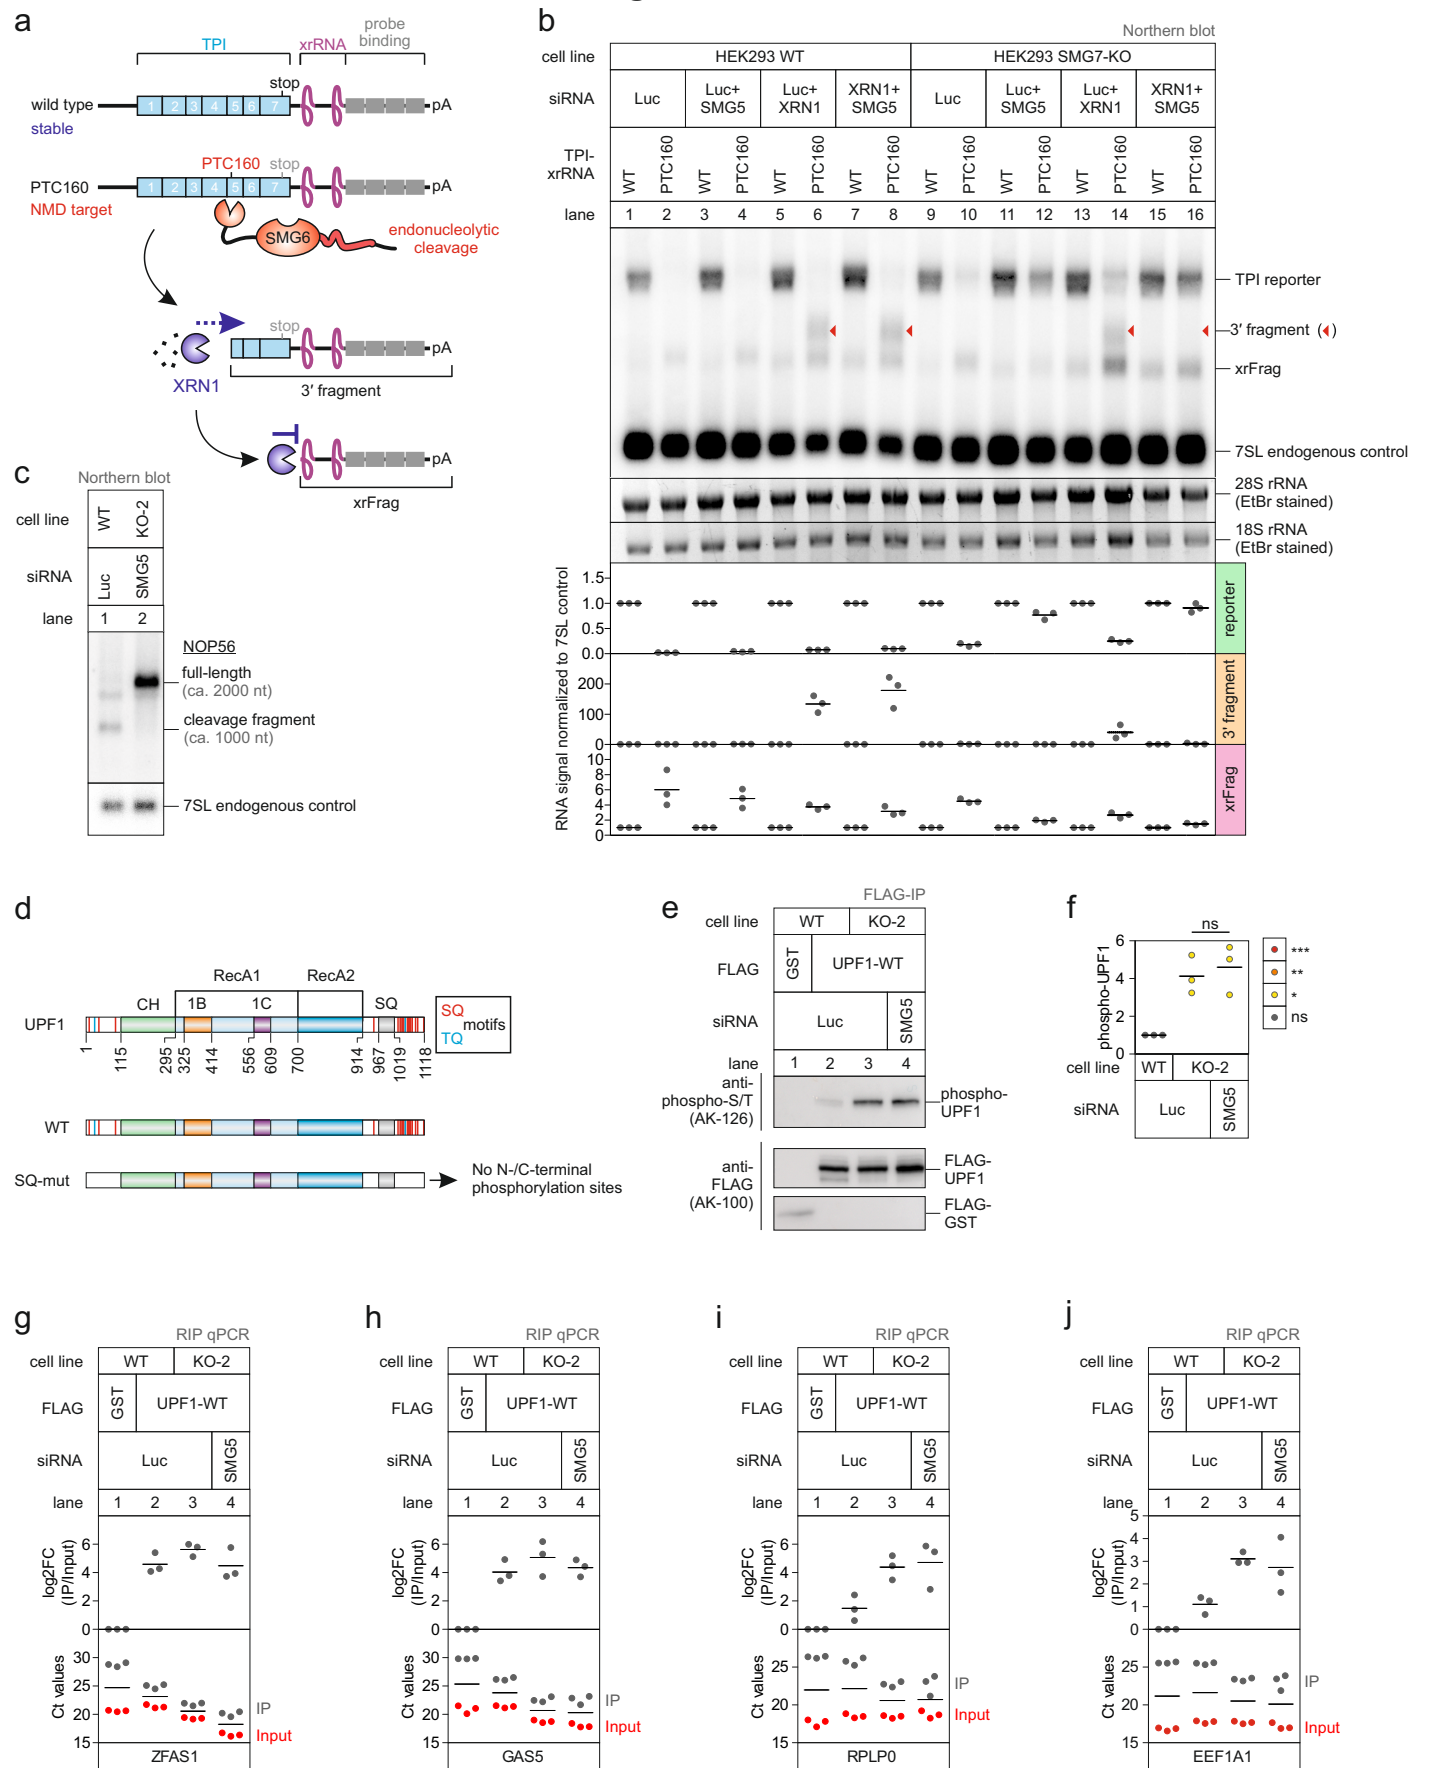

**Fig. 4: SMG6 endonucleolytic cleavage is inactivated in SMG5-SMG7 depleted cells.**

**a.** Schematic overview of the triosephosphate isomerase (TPI) reporter constructs and their functional elements.

**b.** Northern blot analysis of TPI reporter, 3' fragments, xrFrag and 7SL endogenous control. Ethidium bromide stained 28S and 18S rRNAs are shown as additional controls. Quantification results are shown as data points and mean (n=3).

**c.** Northern blot analysis of endogenous NOP56. Different transcript isoforms are indicated.

**d.** Schematic overview of UPF1, highlighting the putative SQ/TQ phosphorylation sites.

**e-f.** Analysis of UPF1 phosphorylation status after IP of expressed FLAG-tagged UPF1 (**f**) with quantification (**g**). Quantification results are shown as data points and mean (n=3).

**g-j.** qPCR detection of ZFAS1 (**h**), GAS5 (**i**), RPLP0 (**j**) and EEF1A1 (**k**) was carried out in IP and Input samples after RNA immunoprecipitation (RIP) with FLAG-tagged UPF1. Data points and means from the qPCRs are plotted as log<sub>2</sub> fold change (log<sub>2</sub>FC) (n=3). Raw Ct values are shown for comparison.



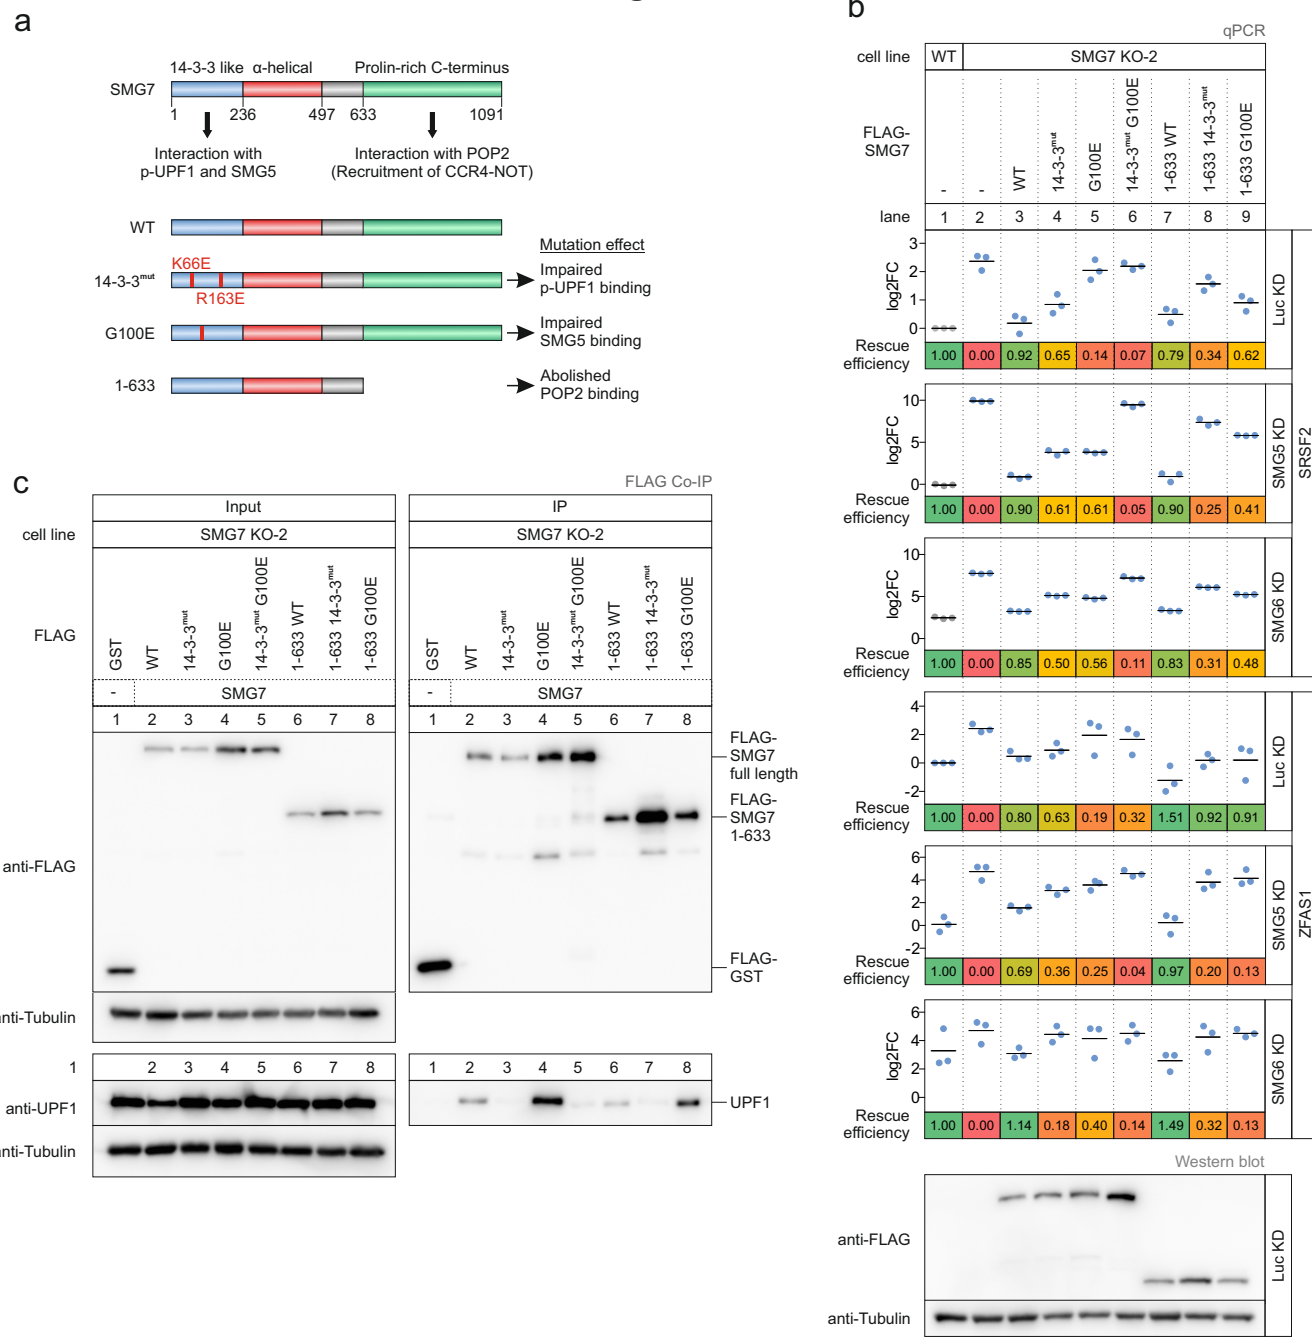

**Fig. 5: SMG7 supports NMD independently of the deadenylation-promoting function.**

**a.** Schematic representation of the SMG7 domain structure. The proposed functions of the domains are indicated and mutated constructs and their expected effect are shown below.

**b.** Quantitative RT-PCR-based detection (qPCR) of SRSF2 isoforms and ZFAS1 was carried out in the indicated cell lines upon expression of the indicated FLAG-tagged rescue constructs and knockdown with the indicated siRNA. The ratio of NMD isoform to canonical isoform was calculated; data points and means from the qPCRs are plotted as log<sub>2</sub> fold change (log<sub>2</sub>FC) (n=3). Western blot analyses are shown below. Tubulin serves as control.

**c.** Western blot after co-immunoprecipitation (IP) of FLAG-tagged GST (control) or SMG7 constructs. Tubulin serves as control.

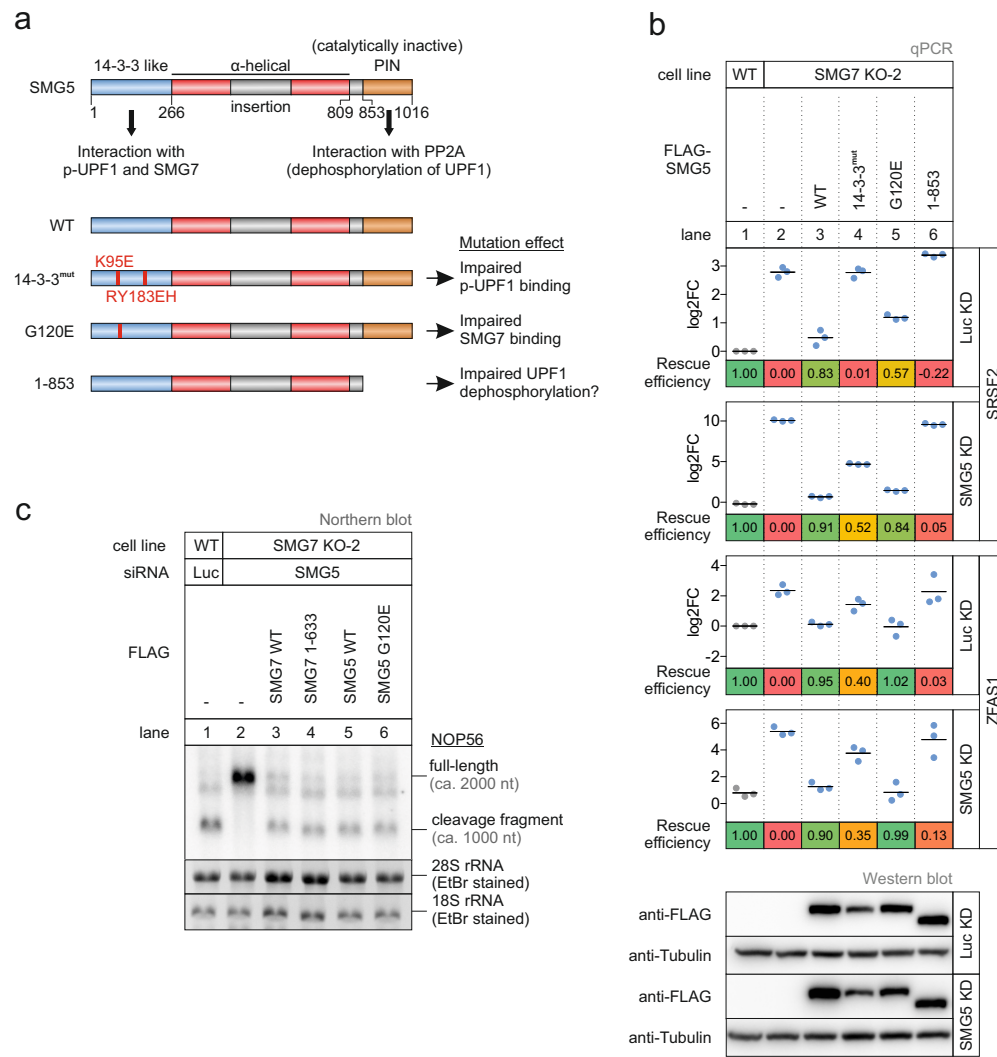

**Fig. 6: SMG5 expression rescues the SMG7 KO phenotype.**

**a**, Schematic representation of the SMG5 domain structure. The proposed functions of the domains are indicated and mutated constructs and their expected effect are shown below.

**b**, Quantitative RT-PCR-based detection (qPCR) of SRSF2 isoforms and ZFP51 was carried out in the indicated cell lines upon expression of the indicated FLAG-tagged rescue constructs and knockdown with the indicated siRNA. The ratio of NMD isoform to canonical isoform was calculated; data points and means from the qPCRs are plotted as log<sub>2</sub> fold change (log<sub>2</sub>FC) (n=3). Western blot analyses are shown below. Tubulin serves as control.

**c**, Northern blot analysis of endogenous NOP56 (n=3). Different transcript isoforms are indicated.



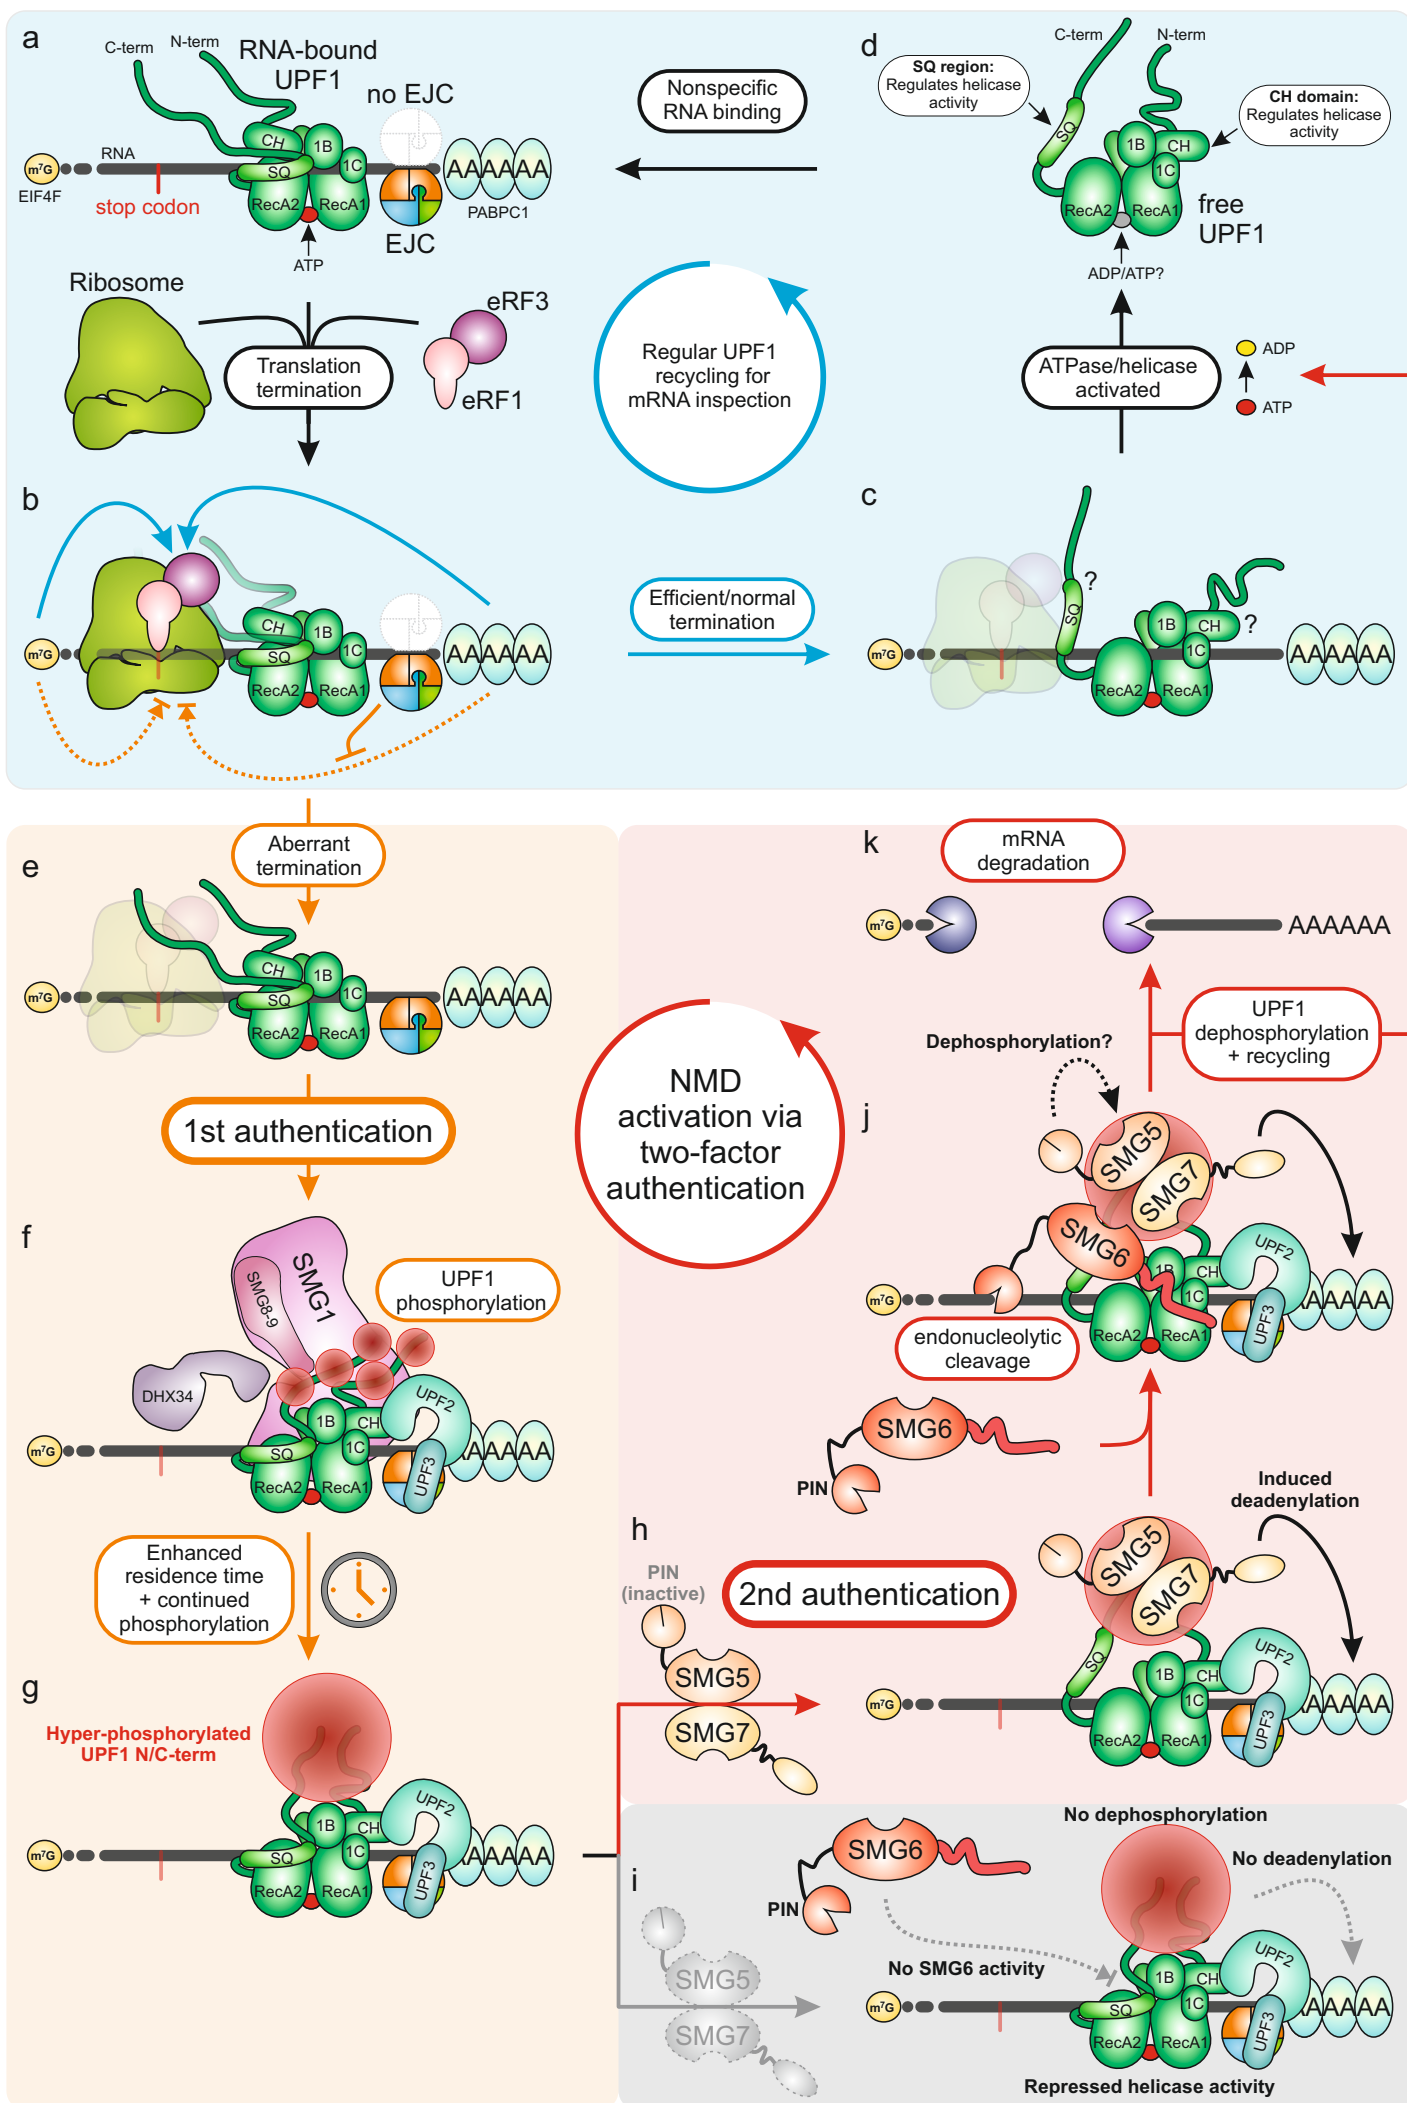

**Fig. 7: Two-factor authentication model of NMD.**

**a-d**, Regular inspection cycle of UPF1. UPF1 binds mRNA unspecifically and remains attached until being displaced by the ribosome. UPF1 helicase and ATPase activity is stimulated when ribosomes terminate translation efficiently. Subsequently, UPF1 dissociates from the mRNA and can engage in a new cycle of inspection.

**e-g**, First NMD authentication step. Upon aberrant translation termination (e.g. EJC downstream of terminating ribosome), UPF1 remains bound on the mRNA. If an NMD activating features exist, UPF1 is progressively phosphorylated by the kinase SMG1. Continued presence of UPF1 on the mRNA and NMD-activating features lead to hyper-phosphorylated UPF1.

**h-k**, Second NMD authentication step. If SMG5-SMG7 are absent, the hyper-phosphorylated UPF1 accumulates and NMD cannot successfully eliminate the target transcript. Also, UPF1 is not recycled. If SMG5-SMG7 are present, the interaction with UPF1 allows the binding of SMG6 to UPF1 in order to catalyze the endonucleolytic cleavage of the target transcript. The target transcript is fully degraded by exonucleolytic activities. SMG5 may subsequently dephosphorylate UPF1, the helicase activity is stimulated and UPF1 is effectively recycled for another round of inspection.

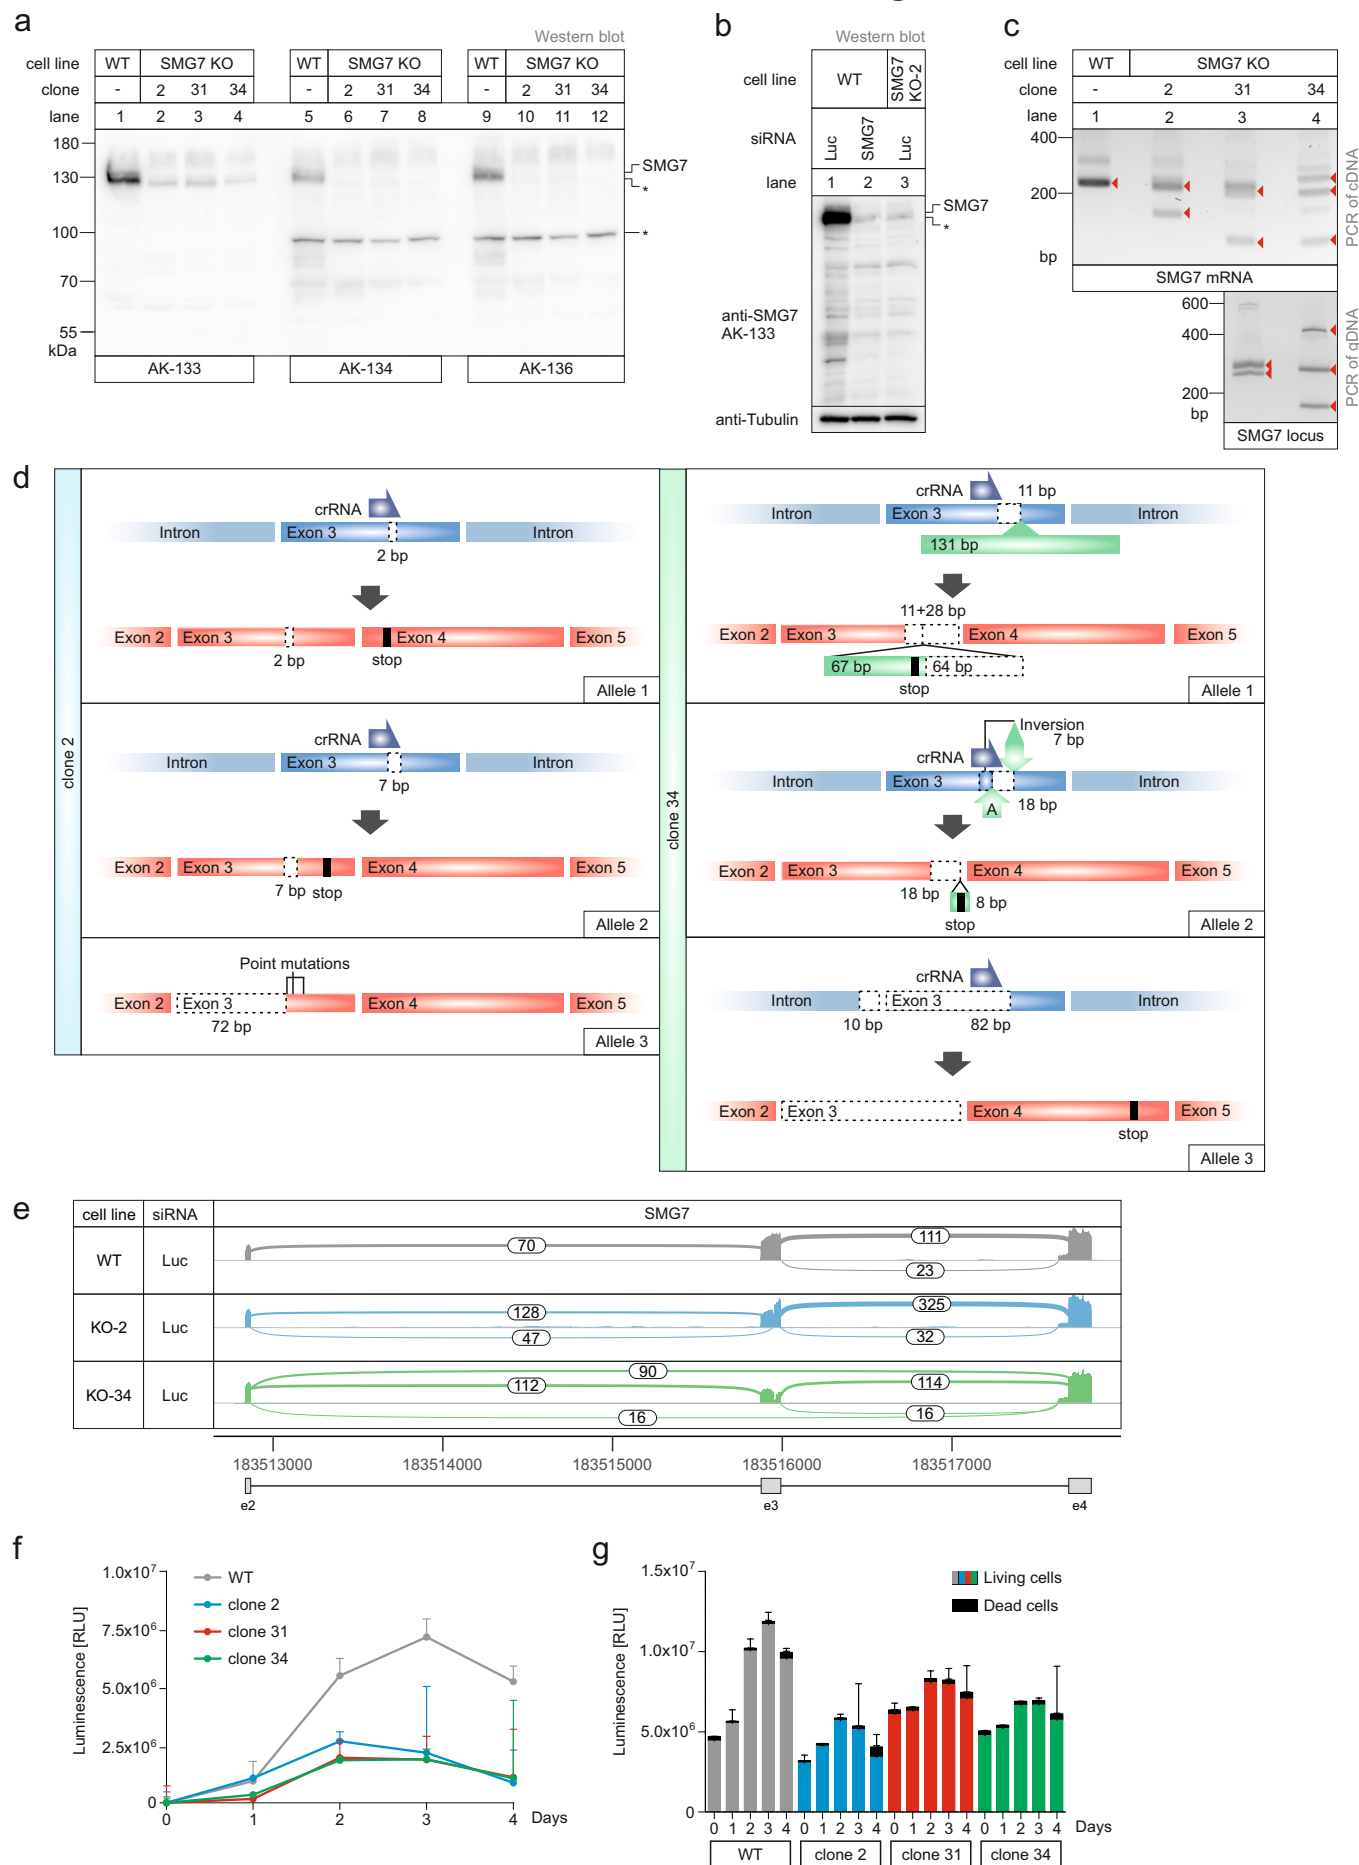

**Extended Data Fig. 1: Characterization of SMG7 knockout cells.**

**a**, Uncropped western blot analysis of SMG7 knockout (KO) cell lines.

**b**, Comparison between SMG7 knockout (KO) and knockdown (KD) conditions with AK-133.

**c**, Detection of SMG7 genomic alterations and splicing variants via PCR. Red arrows indicate identified bands.

**d**, Overview of CRISPR-Cas9 induced alterations on the genomic and transcriptomic level concerning the SMG7 locus.

**e**, Sashimi plot of SMG7 WT, KO-2 and KO-34 clones from RNA-seq data, highlighting alternative splicing events.

**f**, Luminescence-based growth assay of the indicated cell lines.

**g**, Quantification of live and dead cells at the indicated time points of the growth assay.

**Boehm, Kueckelmann et al. 2020. Extended Data Fig. 2**

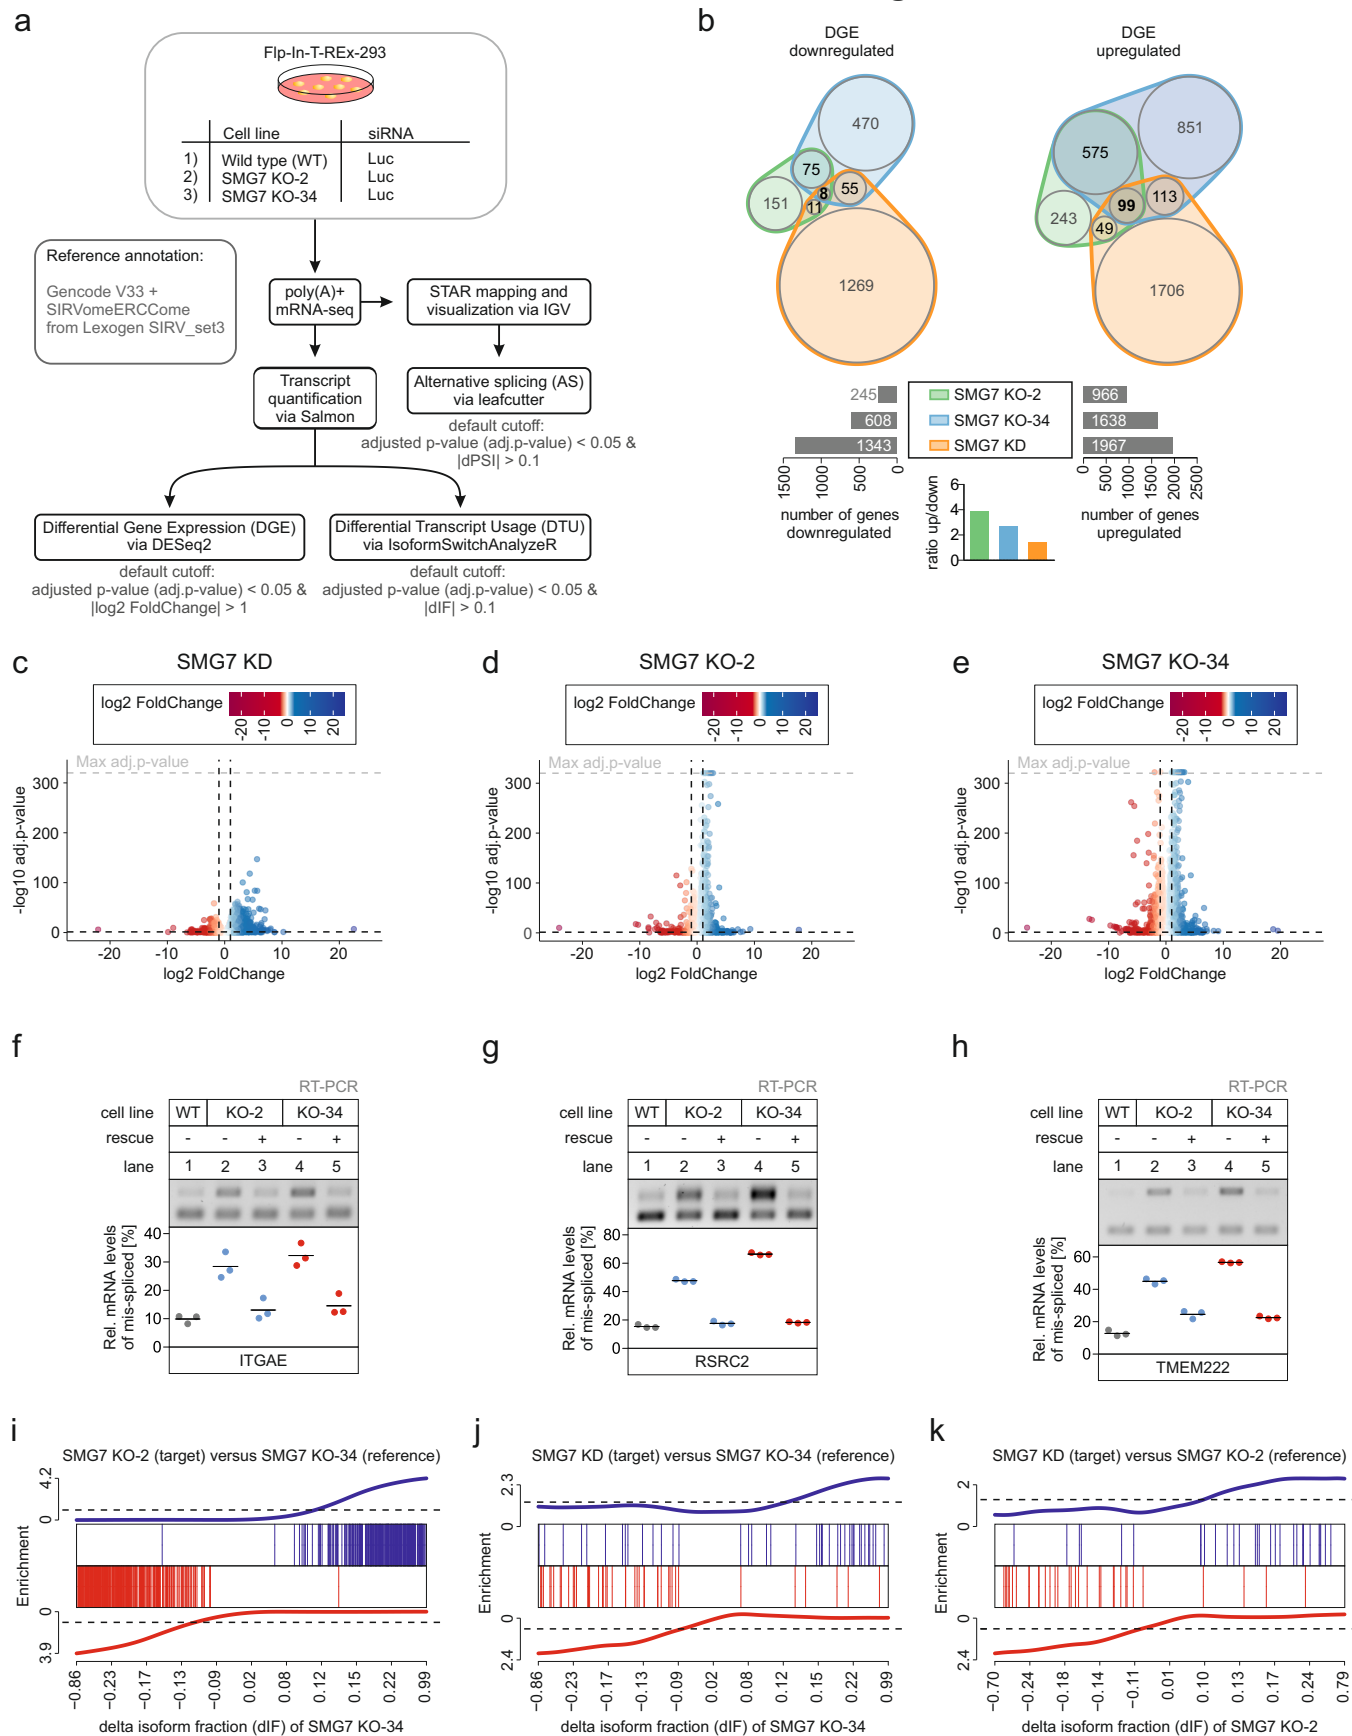

**Extended Data Fig. 2: RNA-Seq analyses of SMG7 KO cells.**

**a**, Schematic overview of the RNA-Seq analysis pipeline.

**b**, Overlap of upregulated and downregulated genes in the differential gene expression (DGE) analysis. Total numbers and ratios are given below.

**c-e**, Volcano plots showing the differential gene expression analyses from the indicated RNA-seq dataset.

**f-h**, End-point RT-PCR detection of ITGAE (F), RSRC2 (G) and TMEM222 (H) transcript isoforms was carried out in the indicated cell lines, with or without expression of FLAG-tagged SMG7 rescue constructs. Data points and means from the gel quantification are plotted (n=3).

**i-k**, Barcode plots showing the enrichment of transcript isoforms that undergo isoform switching (adjusted p-value < 0.05) of the target condition compared to the reference dataset indicated on the x-axis. On the x-axis the dIF of transcripts that undergo isoform switching in the reference are ranked according to their dIF.

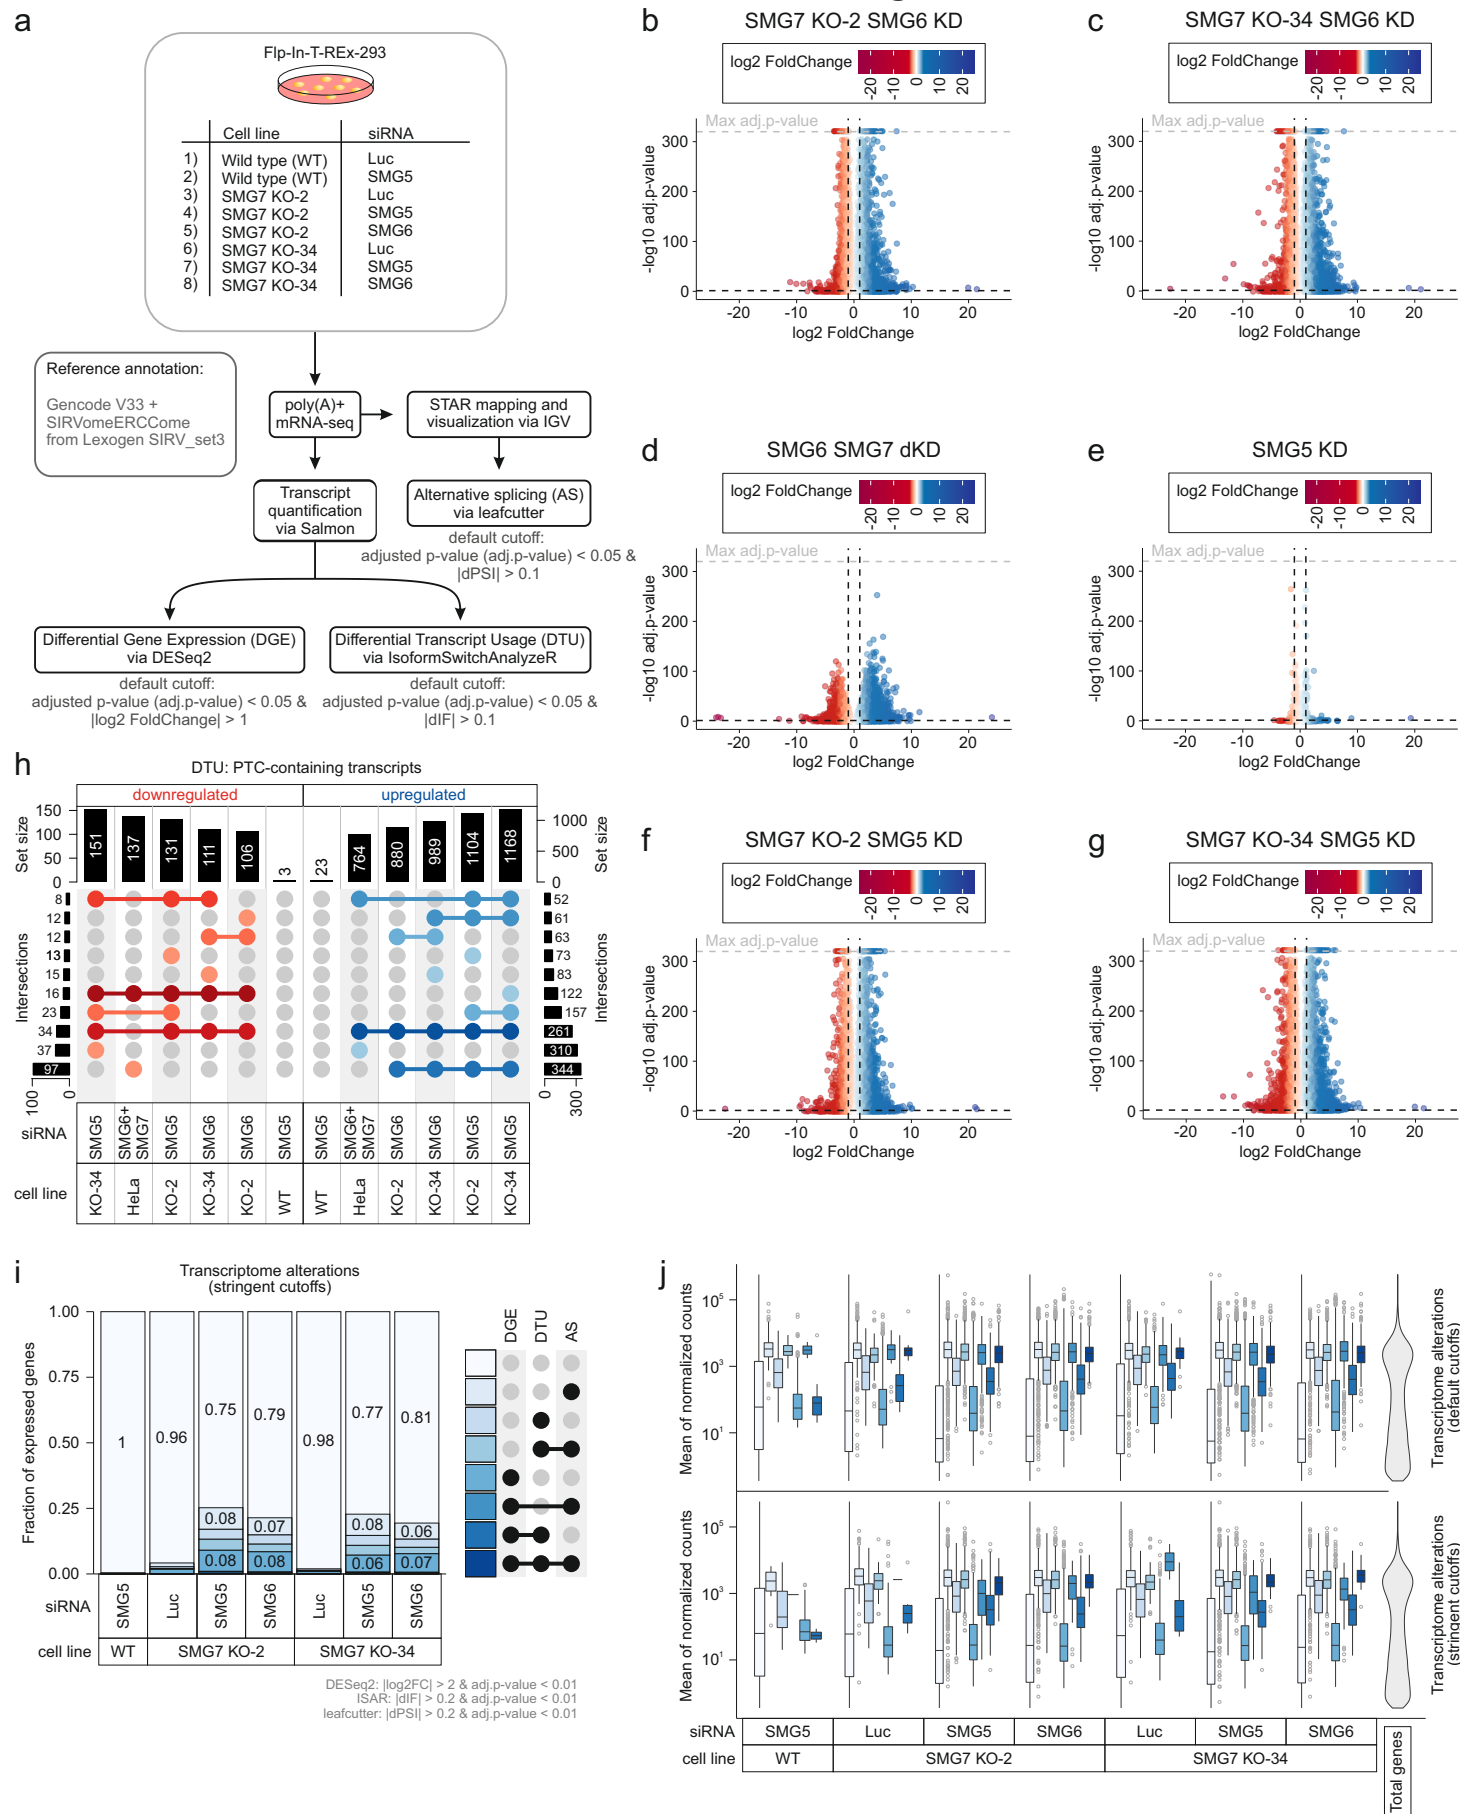

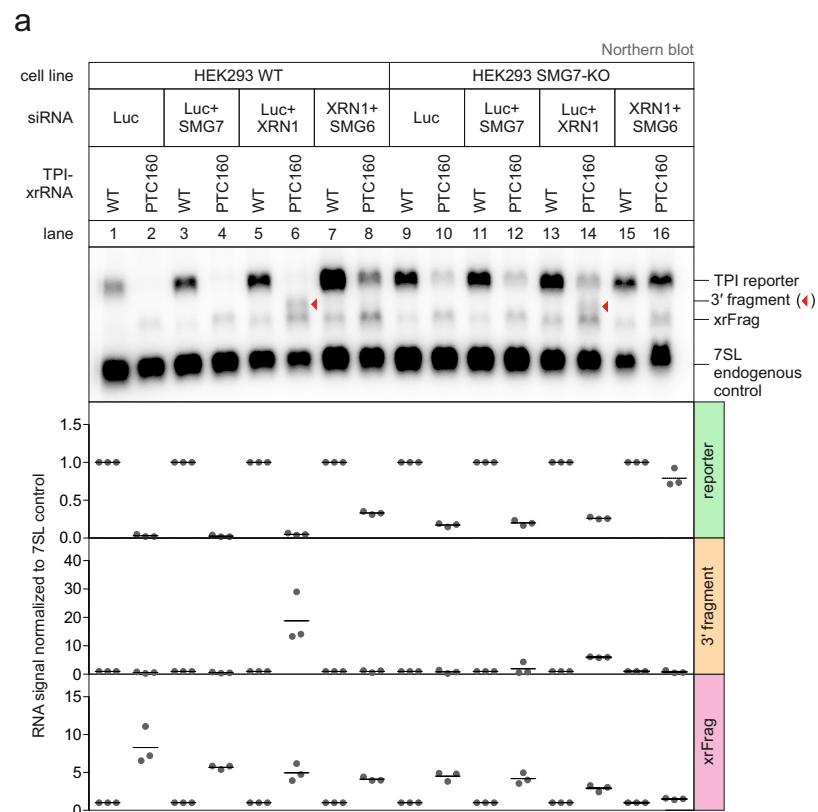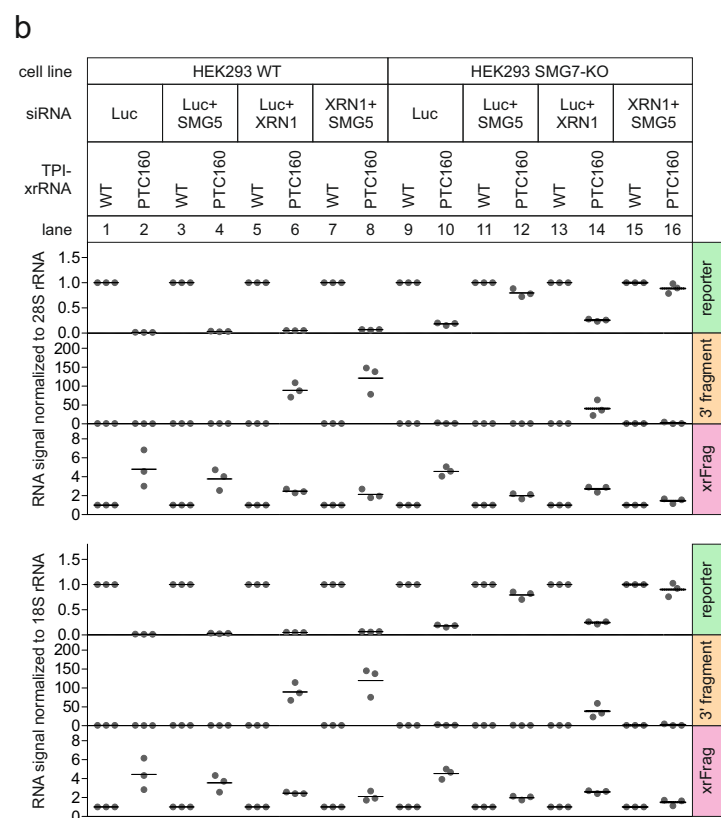

Extended Data Fig. 4: Northern blot analysis of endonucleolytic cleavage.

a, Northern blot analysis of triosephosphate isomerase (TPI) reporter, 3' fragments, xrFrag and 7SL endogenous control. Quantification results are shown as data points and mean (n=3).

b, Quantification of Fig. 4b with 28S or 18S rRNA as reference RNA. Quantification results are shown as data points and mean (n=3).



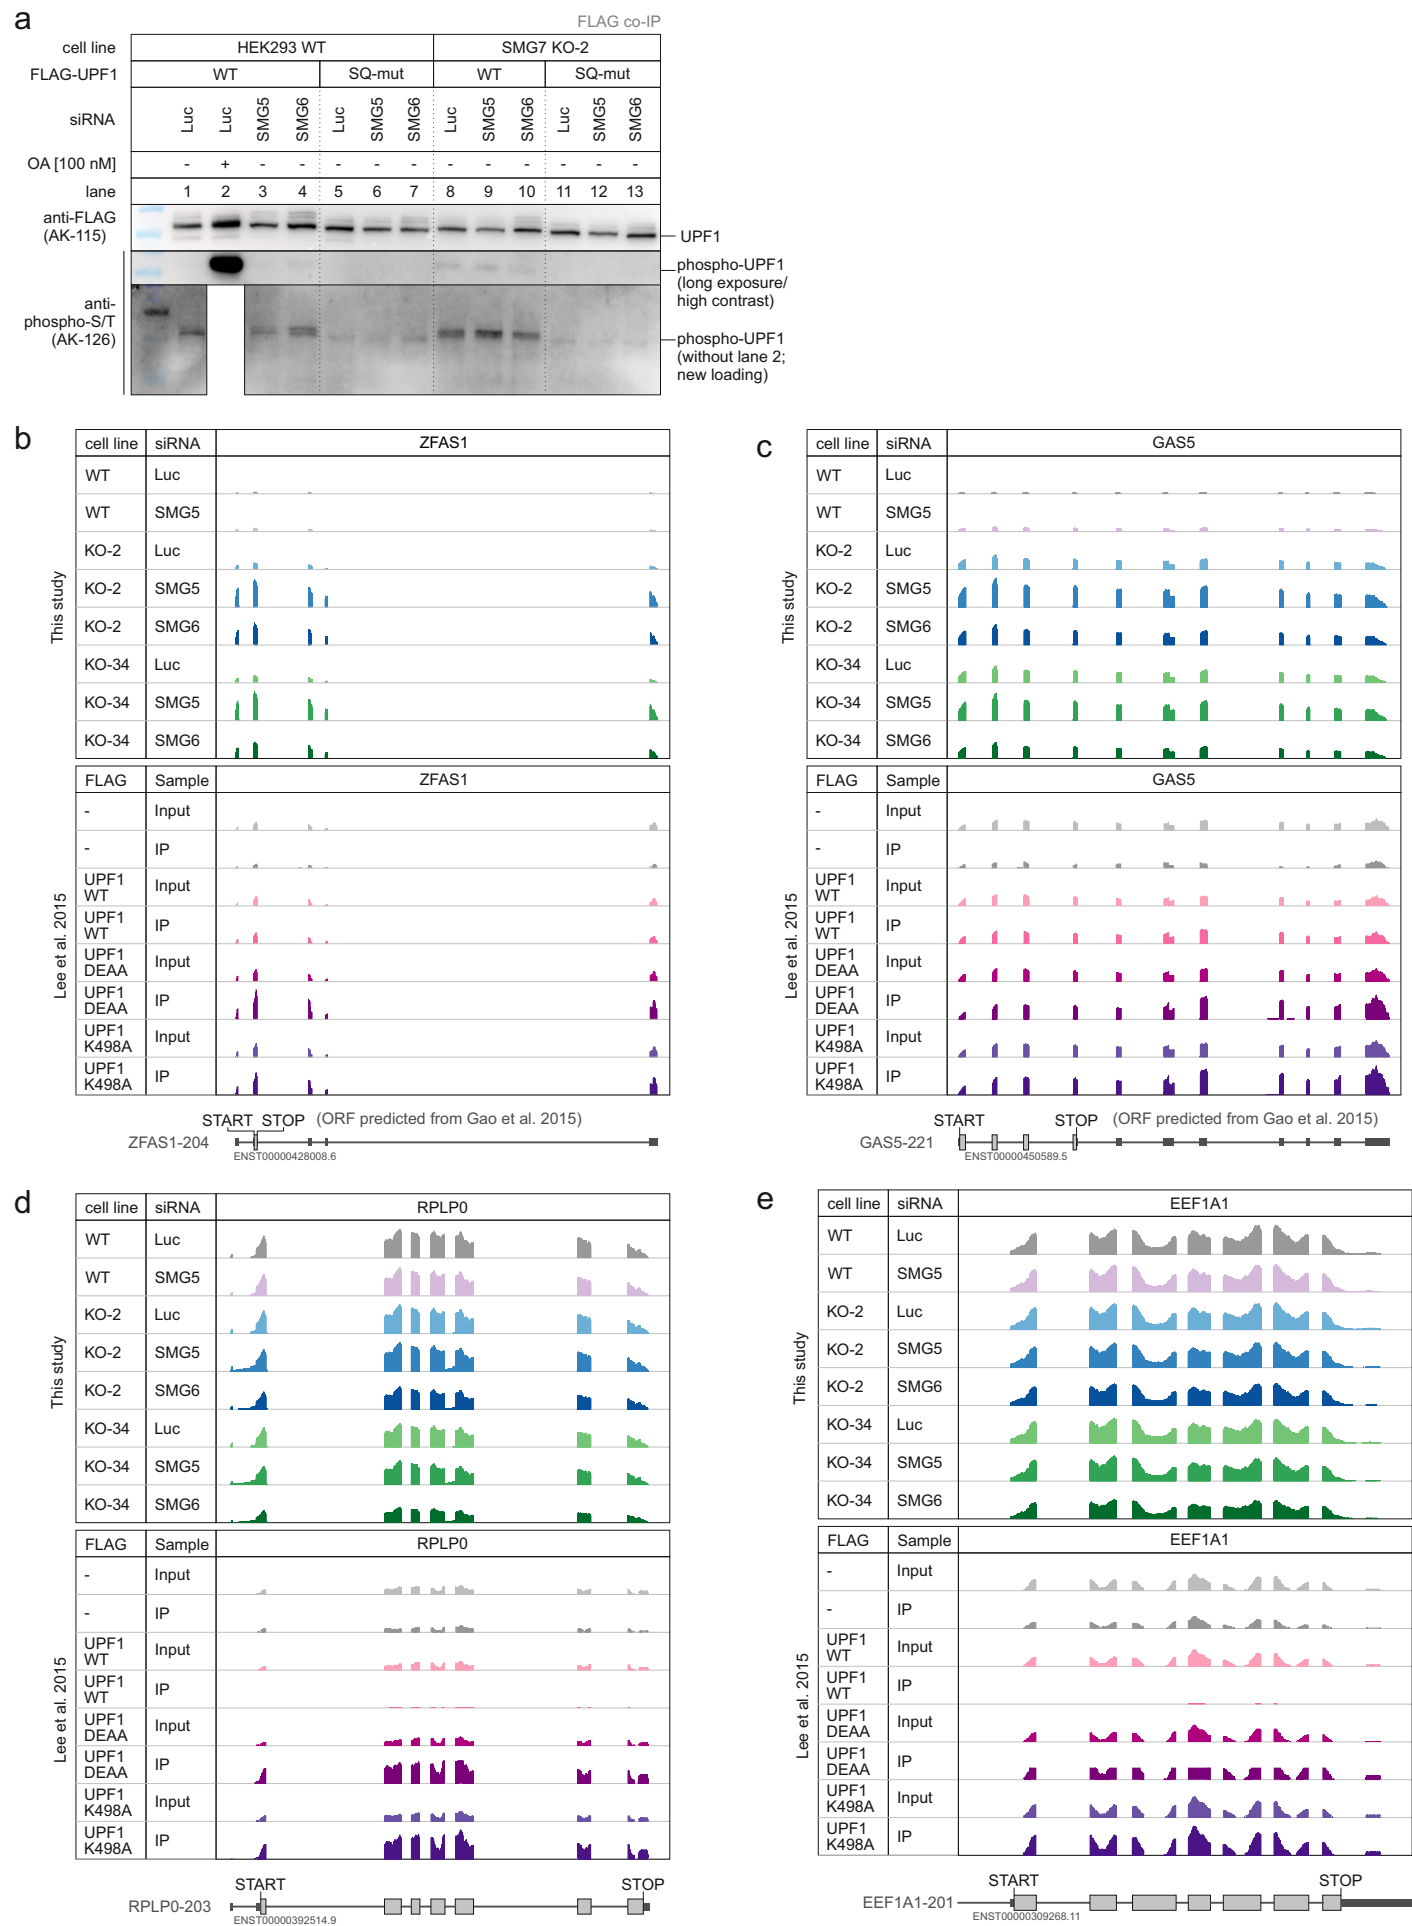

**Extended Data Fig. 5: UPF1 hyper-phosphorylation and target discrimination.**

**a**, Analysis of UPF1 phosphorylation status after co-immunoprecipitation (IP) of expressed FLAG-tagged UPF1 WT or SQ mutant. Okadaic acid (OA) served as inhibitor of PP2A to prevent UPF1 dephosphorylation.

**b-e**, Read coverage of the indicated genes from SMG7 KO plus knockdown RNA-seq data and published RIP-Seq data (Lee et al. 2015) are shown as Integrative Genomics Viewer (IGV) snapshots. The canonical isoform is schematically indicated below. If no translated ORF was annotated, QTI-seq data (Gao et al. 2015) were used to predict ORFs.
